1 **Growth of the *Fucus* embryo: insights into wall-**  
2 **mediated cell expansion through mechanics**  
3 **and transcriptomics**

4 **Author list**

5 Marina Linardić<sup>123</sup>, Shawn J. Cokus<sup>2</sup>, Matteo Pellegrini<sup>2345</sup>, and Siobhan A.  
6 Braybrook<sup>1234\*</sup>

7 <sup>1</sup> Sainsbury Laboratory, University of Cambridge, UK

8 <sup>2</sup> Department of Molecular, Cell and Developmental Biology, University of California  
9 Los Angeles, USA

10 <sup>3</sup> Department of Energy Institute of Genomics and Proteomics, University of California  
11 Los Angeles, Los Angeles, USA

12 <sup>4</sup> Molecular Biology Institute, University of Los Angeles, Los Angeles, USA

13 <sup>5</sup> Institute for Quantitative and Computational Biosciences, University of California, Los  
14 Angeles, USA

15

16 \*corresponding author: [siobhanb@ucla.edu](mailto:siobhanb@ucla.edu)

## 17 **Abstract**

18 Morphogenesis in walled organisms represents a highly controlled process that  
19 involves cell proliferation and expansion; cell growth is regulated through changes in  
20 the structure and mechanics of the cells' walls. Despite taking different evolutionary  
21 paths, land plants and some brown algae exhibit developmental and morphological  
22 similarities; however, the role of the algal cell wall in morphogenesis remains heavily  
23 underexplored. Cell expansion in plants is hypothesized to involve modifications of  
24 hemicellulose linkages and pectin gelation in the cell wall. Little is known about the  
25 wall-based control of cell expansion in brown algae; however, the algal analog to  
26 pectin, alginate, exhibits different gelation depending on its biochemistry. Here we  
27 show that cell wall mechanics and alginate biochemistry are correlated with cell  
28 expansion versus proliferation in the developing *Fucus serratus* embryo. In the  
29 elongating cells of the embryo rhizoid, we found a reduced cell wall stiffness and lower  
30 amounts of 'stiffer' alginate epitopes. In comparison, the early embryo thallus was  
31 shown to undergo cleavage-type cell proliferation, without expansion, and this was  
32 correlated with higher amounts of 'stiff' alginate epitopes and increased wall stiffness.  
33 An embryo development RNAseq dataset was generated to characterize differential  
34 gene expression during development. This data set allowed for identification of many  
35 enriched GO functions through developmental time. In addition, the transcriptome  
36 allowed for the identification of cell-wall related genes whose differential expression  
37 may underlie our observed growth phenotypes. We propose that differential gene  
38 expression of genes involved in alginate stiffness are strong candidates underlying  
39 differential wall stiffness and cell elongation in the developing *Fucus* embryo. Our  
40 results show that wall-driven cellular expansion mechanisms in brown algae are

41 similar to those observed in plants. In addition, our data show that cleavage-type cell  
42 proliferation exists in brown algae similar to that seen in plant and animal systems  
43 indicating a possible conserved developmental phenomenon across the branches of  
44 multicellular life.

## 45 **Introduction**

46 The formation of shapes has been of interest in the field of developmental  
47 biology for a long time, both in animal and plant systems (1). In walled multicellular  
48 organisms, such as plants and algae, morphogenesis results from cell expansion,  
49 division, and differentiation (2,3). In plants, cell expansion is regulated mechanically  
50 by the balance between cell wall material and internal turgor pressure; when the  
51 balance tips, cell expansion results (4). A similar mechanical truth seems to exist for  
52 brown algal cells, given recent findings in the tip-growing cells of a model species,  
53 *Ectocarpus siliculosus* (5,6).

54 In plants, cell expansion has recently been correlated with changes in wall  
55 matrix: the gel within which cellulose and hemicellulose fibers are embedded. In the  
56 model plant *Arabidopsis thaliana*, the biochemical and linked mechanical, properties  
57 of the pectin homogalacturonan within the cell wall matrix have been shown to regulate  
58 the magnitude of cell expansion (7–14). This may provide a direct mechanism for  
59 pectin rigidity to regulate cell expansion, but indirect effects from movement of other  
60 molecules within the cell wall (such as cellulose fibers or modifying proteins) may also  
61 be relevant (14,15). Multicellular brown algal bodies are built from walled cells (16),  
62 whose cell walls are composed of cellulose, matrix polysaccharides, and proteins  
63 (more information on their biosynthesis and diversity can be found here (17,18)). With

64 cellulose content estimated at 1%-20% (19,20), it is hypothesized that the wall gel  
65 matrix might be important for mechanical regulation of growth, similar to plant pectin  
66 (15,21,22).

67         Multicellular brown algae share a striking amount of morphogenetic similarity  
68 with plants and are often mistaken for plants. Similar developmental patterns such as  
69 from organ arrangement (23) and embryo patterning (24–28) to cell expansion types  
70 (e.g. tip growth (6), has led to this common misconception; however, brown algae are  
71 only very distantly related to the Viridiplantae (i.e. plants and green algae) and are  
72 estimated to have appeared  $\approx$ 200 million years ago (29) through an independent  
73 evolutionary path. Since both plants and brown algae have cell walls with calcium  
74 cross-linked gel matrices, but independent evolutionary paths, the comparison of wall-  
75 regulated morphogenesis on a physical level may prove interesting; perhaps a similar  
76 set of physical rules regulating expansion might be operating. In the model plant  
77 *Arabidopsis thaliana*, cell expansion and division are critical for patterning the young  
78 embryo body after the first asymmetric cell division (30). Conversely, there is very little  
79 data on brown algal embryogenesis and its regulation.

80         Brown algal zygotes and embryos have served as a system to explore early  
81 morphogenetic events, such as polarity and asymmetric division since they fertilize  
82 and develop free from maternal tissue. The maternal-free aspect provides  
83 experimental access not found in plants, and *Fucus* has been used as a model species  
84 to study polarity and asymmetry during early embryo development (31–36). The initial  
85 asymmetric cell division produces two cells - a rhizoid and a thallus cell - with distinct  
86 morphologies and fates. The rhizoid cell generates the holdfast which will attach the  
87 alga to substrates, as well as the the stipe (stem) of the mature alga. The rest of the

88 algal body (fronds, air bladders, and fertile structures in *Fucus*) develops from the  
89 thallus cell (25).

90 In *Fucus*, the cell wall matrix polysaccharides are sulfated fucans and alginate  
91 (17,18,37,38). It has been suggested that sulfated fucans play an important role in  
92 *Fucus* zygote polarization (39–41) but any role in cell expansion has yet to be  
93 uncovered. Currently, alginate seems a strong candidate for a matrix polysaccharide  
94 in brown algae that could regulate cell expansion. Alginate comprises the majority of  
95 the brown algal cell wall ( $\approx 50\%$ ; (19,20). Like homogalacturonan in plants, alginate  
96 can cross-link with calcium, and thus regulate gel rigidity (21). Despite this mechanical  
97 similarity, alginate is distinct from pectin in structure as it is a linear polysaccharide  
98 composed of  $\beta$ -1,4-D-mannuronate (M) and  $\alpha$ -1,4-L-guluronate (G) (42), produced as  
99 a mannuronate chain whose individual sugars can be epimerized to guluronate by  
100 mannuronan C-5 epimerases (43–45). It is the contiguous regions of guluronate, G-  
101 blocks, that form “egg-box” crosslinks with positively charged cations (such as  $\text{Ca}^{2+}$ )  
102 leading to gelation (21,46). The mechanical properties of the alginate gel, and  
103 therefore presumably the *Fucus* cell wall, are thus dependent on the amount of M and  
104 G sugars present: mixed MG regions are most flexible, followed by M-rich regions,  
105 with G-rich regions being the stiffest (MG flexibility > MM > GG; (47)).

106 Since *Fucus* affords a maternally-free developing embryo, it is an ideal system  
107 for studying the mechanics of morphogenesis in brown algae, and, specifically, that  
108 underlying cell expansion.

109 Here, we explore the mechanical basis of wall-mediated growth in the *Fucus*  
110 *serratus* embryo through a combination of atomic force microscopy and alginate  
111 immunohistochemistry. Furthermore, we present the first brown algal embryo

112 development transcriptome and explore the expression of cell wall biosynthesis and  
113 modification genes in early embryo growth. We utilize our data to hypothesize that cell  
114 expansion in the *Fucus* zygote is regulated, in part, by alginate biochemistry and  
115 resulting wall mechanics. Our findings point to a physical similarity between the  
116 mechanical regulation of cell expansion in plants and brown algae.

## 117 Results

### 118 The *Fucus* embryo exhibits distinct growth behaviors between the rhizoid and 119 thallus

120 The exploration of morphogenesis and growth in *Fucus* has focused mainly on  
121 the earliest events of polarization and asymmetric division (26,27,31,39,48–52). As  
122 such, no significant quantitative data on growth exists for embryo development beyond  
123 the first few days after fertilization (DAF). In order to explore *Fucus* embryo  
124 morphogenesis further, we examined embryo growth for 7 DAF at the organism and  
125 cell levels.

126 Using light microscopy, we first characterized the growth of the *Fucus* embryo  
127 on an organismal level. The embryo elongated over time at a decreasing rate, reaching  
128 a length of ~ 600  $\mu\text{m}$  by 7 DAF (Fig. 1A) with initial rapid elongation leveling out  
129 between 3–7 DAF (Fig. S1A). Upon closer examination, embryos exhibited a highly  
130 consistent pattern of growth, distinct between the thallus and rhizoid body organs (T  
131 and R in Fig. 1A). Qualitatively, the thallus did not appear to elongate or increase in  
132 surface area for the first 5 DAF (Fig. 1A/B yellow); after 5 DAF, thallus began growing  
133 (Fig. 1A purple). In contrast, the rhizoid elongated from the beginning and contributed

134 to the majority of to the embryos' growth in length over the seven days (Fig. 1A/S1B  
135 green). Rhizoid elongation was directional with tip-like growth (Fig. S1C). As such,  
136 the leveling off (circa 3 DAF) of the whole organism elongation rate likely results from  
137 a decrease in rhizoid elongation, as observed qualitatively in our images (Fig. 1A  
138 green). After the drop in rhizoid elongation, embryos appeared to maintain elongation  
139 through the onset of thallus elongation (Fig. 1A/B purple). From these observations,  
140 we conclude that the *Fucus* embryo displays three distinct growth phases during 0-7  
141 DAF: (i) an early phase dominated by rhizoid elongation, (ii) a middle phase where  
142 rhizoid elongation slows and thallus expansion initiates, and (iii) a late period  
143 dominated by thallus expansion.

144 To examine the contribution of cell-level growth (i.e., division and expansion) to  
145 the organ-level growth patterns we observed, we quantified cell shape and size over  
146 time. For this, we followed cell wall staining with confocal imaging and MorphoGraphX  
147 analysis (53). In our hands, staining with calcofluor white yielded our best cell outlines  
148 in developing embryos, allowing visualization and quantification of cell surface areas.  
149 However, we were only able to image cell surfaces in epidermis, despite numerous  
150 methodological attempts, including fixation and clearing as employed by Yoshida et  
151 al. (30) in the *Arabidopsis* embryo. At 1 DAF, the expected asymmetry in thallus and  
152 rhizoid initial cells was evident (Fig. 1B). We therefore proceeded to time sample  
153 embryos and analyze epidermal cell division and expansion in a pseudo-growth series.

154 While our light microscopy had indicated little expansion in the thallus up to 5  
155 DAF, we were able to see cell divisions occurring in this tissue as early as 2 DAF (Fig.  
156 1B). Thallus divisions occurred rapidly on the embryo surface (Fig. 1B). These  
157 divisions, however, did not seem to increase the thallus size before 5 DAF (Fig. 1B)

158 and instead resulted in a decrease in the surface area of daughter cells with a plateau  
159 achieved circa 5 DAF (Fig. 1B).

160 This suggests that, in the early stages of embryo development the thallus  
161 undergoes cleavage-type divisions, with little to no cell expansion. This phenomenon  
162 is rare in plant development but observed in the early embryos of the plant *Arabidopsis*  
163 and in metazoan embryos (30,54). After 5 DAF, cell surface area expansion was  
164 observed coincident with cell division yielding a near-constant mean cell surface area  
165 (5 – 7 DAF cell surface area =  $242 \pm 22 \mu\text{m}^2$ ; Fig. 1B). Note that 5 DAF mark is also  
166 where our light microscopy indicated that the thallus began elongation (Fig. 1A). Note  
167 that 5 DAF corresponds to visible appearance of apical hairs (Fig. S1D); apical hair  
168 development is linked to meristematic cell establishment and is necessary for further  
169 embryo growth (55). As such, it seems likely that the establishment of a meristematic  
170 cell in *Fucus* is necessary for volumetric thallus growth. We thus conclude that the  
171 *Fucus* thallus initially undergoes cleavage-type divisions but soon transitions to a  
172 combination of cell expansion and division that yields a growing organ.

173 Confocal observations of growing rhizoids indicated that rhizoid cells underwent  
174 expansion from 1 DAF, followed by divisions (Fig. S1B). Initial single rhizoid cell grew  
175 by tip-growth (Fig. S1C), and as the rhizoid extended, several perpendicular divisions  
176 occurred. Tip-growth has recently been described for the filamentous brown alga  
177 *Ectocarpus* (6). Interestingly, the filamentous cell in *Ectocarpus* may exhibit tip-growth  
178 due to a thinning of the cell wall near the tip as opposed to the material composition  
179 differences as in plants and fungi (6); as a brown alga, *Fucus* may share a similar tip-  
180 growing mechanism to the one in *Ectocarpus*. The sum rhizoid cell surface area  
181 showed a rapid increase within the first 2 DAF (Fig. S1B) with a slowing over time



182 terminating with holdfast production (~10 DAF, data not shown); recall that our organ-  
183 level elongation rate began decline by 3 DAF (Fig. 1A). These data are consistent with  
184 an early and rapid rhizoid elongation supported by cell division.

185         Taken together, our data paint the following picture of *Fucus* embryo growth  
186 over the first 7 DAF: after asymmetric division at 1 DAF, the rhizoid elongates rapidly  
187 through expansion and division for the first 3 DAF. During this time, the thallus  
188 undergoes cleavage-type divisions but does not increase appreciably in organ size. At  
189 3 DAF, rhizoid elongation begins to slow, likely in preparation for holdfast formation.  
190 During this interval, it is likely that the meristematic apical cell was established within  
191 the thallus, leading to the growth of the thallus starting at 5 DAF via cell expansion and  
192 division. As such, there are three growth phases evident in the early *Fucus* embryo –  
193 (i) rapid elongation and division in the rhizoid, (ii) cleavage divisions in the thallus, and  
194 (iii) coupled elongation and division coupled within the thallus. The combination of  
195 these growth modes yields the characteristic *Fucus* embryo morphogenesis.

### 196 **Embryo growth phases correspond to changes in tissue mechanics**

197         In plants, cell expansion has been correlated with changes in cell wall  
198 mechanics that allow the cell wall to yield to turgor pressure, resulting in growth  
199 (15,56,57). Given the presence of cell walls in the *Fucus* embryo, we wondered  
200 whether cell wall mechanics might underlie the different growth modes observed,  
201 specifically cleavage-type volumetric division in the thallus versus expansion followed  
202 by division in the rhizoid. To assess cell wall stiffness in developing *Fucus* embryos,  
203 we employed Atomic Force Microscopy (AFM) based indentation. AFM indentation  
204 examines the force required to deform cell wall material within a given area providing  
205 spatial resolution. This technique was applied to embryos at 3 DAF when the thallus

206 and rhizoid displayed differential growth behavior; indentations were performed along  
207 the longitudinal axis of the embryos so as to obtain information about both thallus and  
208 rhizoid from each sample.

209 Analysis revealed that at 3 DAF the *Fucus* thallus was stiffer than the rhizoid  
210 (Fig. 2A/B). This observation correlates wall stiffness with cell elongation, providing  
211 support for a relationship similar to that seen in plants: stiffer cell walls reduce cell  
212 elongation. We performed additional AFM-based stiffness measurements at 1 and 10  
213 DAF (Fig. S2) and observed that the rhizoid was consistently less stiff than the thallus.  
214 The thallus was at its stiffest in the 3DAF samples (Fig. 2A/B, S2) coincident with the  
215 cleavage-type divisions observed in the thallus at this stage of growth.

### 216 **Alginate biochemistry links to wall mechanics and the *Fucus* embryo expansion** 217 **pattern**

218 Given the relationship between pectin biochemistry and wall stiffness in plants,  
219 and the biochemical relationship between alginate epimerization and gel stiffness (21),  
220 we next examined alginate biochemistry using monoclonal antibodies (39). Antibodies  
221 recognized guluronic (G)-rich areas (BAM10), mannuronic (M)-rich areas (BAM6), and  
222 mixed mannuronic-guluronic (MG) regions (BAM7). These types of alginate likely  
223 correspond to stiff, intermediate, and least stiff (58) alginate mechanical behavior.  
224 Whole-mount immunolocalizations were performed on fixed 3 DAF embryos when the  
225 difference between the thallus and rhizoid was highest in terms of growth behavior  
226 and wall stiffness. All three antibodies successfully reacted with the embryos and  
227 negative controls are shown in Fig. S3.

228           The epitope bound by BAM10 (G-rich areas) was detected more in the thallus  
229 than the rhizoid (Fig. 2C/D), indicating this region may contain stiffer alginate  
230 compared to the rhizoid. Conversely, the epitope of a softer alginate (BAM7; MG-rich  
231 areas, Fig. 2E/F) was detected at higher levels in the rhizoid and the rhizoid tip,  
232 compared to the thallus. Both BAM10 and BAM7 showed fluorescence in the rhizoid  
233 tip, as has been observed previously (5) and may relate to the secretion of the  
234 adherent matrix. BAM6 (M-rich areas, Fig. 2G/H) did not label the embryo strongly and  
235 its epitope was detected uniformly over the embryo. Our alginate immunolocalizations  
236 are therefore consistent with our stiffness observations in the embryo: the stiffer thallus  
237 presented more G-rich alginate while the less stiff rhizoid presented more of the less-  
238 stiff MG-rich alginate. These data support a model in the *Fucus* embryo where alginate  
239 biochemistry influences cell wall stiffness, which in turn influences cell expansion and  
240 overall embryo growth behavior.

241   **Transcriptional changes during *Fucus* embryo development: a transcriptomic**  
242   **approach**

243           There are currently no means for transformation or mutagenesis in *Fucus* which  
244 would permit direct attack on the correlation between wall stiffness and growth. As  
245 such, we initiated a *de novo* transcriptomics approach to examine changes in gene  
246 expression during embryo development. We generated an embryonic transcriptome  
247 for *Fucus* from pooling three biological replicates for each of four stages of  
248 development: “a”, 7 hours after fertilization (7 hours after fertilization (HAF): round,  
249 fertilized, and a zygote without fixed polarity); “b”, 1 DAF (post-germination and first  
250 asymmetric division); “c”, 3 DAF (thallus divisions and rhizoid elongation); and “d”, 10

251 DAF (thallus growth and rhizoid holdfast formation). Thus, there were a total of 12  
252 RNA-Seq samples.

253 Trinity assembly yielded 127,489 putative transcript isoforms/fragments which  
254 were, after processing (see Methods), considered to represent 24,691 protein-coding  
255 genes (albeit with some genes likely duplicated, fragmented, or partial, or with  
256 incorrect CDS vs. UTR partitioning/codon phasing or intron rejection). Amino acid  
257 alignments to proteins in NCBI found 67% (17K) as known (E-value <  $10^{-5}$ ), with 76%  
258 of the knowns having a best hit to *Ectocarpus siliculosus*. The known count is similar  
259 to the 16K predicted genes of *Ectocarpus*, 14K of *Cladosiphon okamuranus*, and 19K  
260 of *Saccharina japonica* (59–61). 57% of best alignments involved at least half the  
261 sequence of both the *Fucus* and NCBI protein, and the median amino acid identity of  
262 *Fucus–Ectocarpus* alignments over *Fucus* genes with a best hit to *Ectocarpus* was  
263 61%. (Thus, although *Ectocarpus* is the closest organism with good representation in  
264 NCBI, it is not that particularly close to *Fucus* in an absolute sense.) Expression of  
265 many genes changed drastically over the developmental timecourse; of the known  
266 genes, a null hypothesis of constant expression over time was rejected for 20% and  
267 46% at  $q$ -levels  $10^{-5}$  and  $10^{-4}$ , respectively.

268 To characterize differentially expressed genes, Gene Ontology (GO)  
269 enrichment analyses were performed, combining *Fucus* gene-to-GO term  
270 assignments from a run of InterProScan directly on our *Fucus* protein-coding genes  
271 with those transferred from *Ectocarpus* via orthologs as determined by a run of OMA  
272 on *Fucus*, *Ectocarpus*, and four other related organisms. For each of the 74 non-  
273 constant ways (“patterns”) the expression levels of the four timepoints ( $a = 7$  HAF,  $b =$   
274  $1$  DAF,  $c = 3$  DAF,  $d = 10$  DAF) could be weakly ordered (i.e.,  $a < b < c < d$  vs.  $a = b$

275 >  $c = d$  vs. ... except  $a = b = c = d$ ), hypergeometric GO enrichment p-values were  
276 determined for the subset of genes that could be statistically determined to be of that  
277 ordering (see Methods). 25 patterns had at least one GO term with p-value below 10–  
278 4 (see Fig. S7/S8), with highlights summarized in Fig. 3. These patterns fall into six  
279 rough groups based on expression levels peaking at a particular timepoint ( $a$ ,  $b$ ,  $c$ , or  
280  $d$ ) or dipping at a particular timepoint ( $b$  or  $d$ ).

281       Patterns peaking at 7 HAF included terms related to microtubule-based  
282 movement, protein phosphorylation, ion binding, and membrane. Note that as the  
283 zygote is getting ready to asymmetrically divide, it undergoes polar distribution of  
284 cellular components, engaging the cytoskeleton (26,34,62,63). Enriched terms  
285 specific to 1DAF were related to ‘cell cycle’, ‘chromosome organization’ and ‘cell  
286 differentiation’. These enrichments also make sense in terms of embryo biology since  
287 the thallus and rhizoid fates are established here by asymmetric cell division. For  
288 peaking at 1 DAF and transitioning to peaking at 3 DAF, we find terms involving the  
289 cell cycle and cell differentiation, including chromosomes, centromeres, and their  
290 organization and segregation. These are processes one would expect to be enriched,  
291 continuing from 7HAF, as the early fucoid embryo undergoes cell divisions that require  
292 activation of mitotic cell cycle genes and cytoskeleton to give rise to two differentiated  
293 cells, thallus and rhizoid progenitors (24,51).

294       Terms enriched in patterns peaking at 3 DAF or 10 DAF or highest at both  
295 included ones related to protein production/maturation, localization, protons/energy,  
296 binding of vitamins/coenzymes/cofactors, and photosynthesis and its machinery  
297 (including its construction). Indeed, as the embryo matures, the photosynthetic  
298 apparatus becomes more active and photosynthetic efficiency increases (64–66).

299 Peak expression patterns at 10DAF exhibited GO enrichment in terms similar to 3  
300 DAF-peak ones such as ‘translation’, ‘metabolic process’, ‘DNA replication’, ‘gene  
301 expression’. Again, these GO enrichments are consistent with the ongoing maturation  
302 and development of the *Fucus* embryo at 10DAF.

303 Altogether, our embryo transcriptome is consistent with our knowledge of  
304 embryo developmental biology in *Fucus*. We expect that this resource will be valuable  
305 to the community as it represents the first developmental embryo transcriptome of a  
306 brown alga. Further analysis will prove crucial to understanding the whole of *Fucus*  
307 embryo development.

### 308 **Expression pattern of cell wall-related genes**

309 As our previous observations suggested that the differential growth displayed  
310 between the thallus and rhizoid was correlated with cell wall stiffness and alginate  
311 biochemistry, we examined the timecourse expression patterns of genes related to  
312 cellulose, sulfated fucans, and alginate, as these play roles in cell wall biosynthesis  
313 and modification. A table of cell wall biosynthesis genes and their closest homolog in  
314 *Ectocarpus* may be found in Table S1.

315 Twelve genes in our *de novo* transcriptome had homology to cellulose synthases  
316 (Table S1; *Ectocarpus* CESA and CSL; (38)). All were differentially expressed in at  
317 least one time-point (Fig. 4A). Expression patterns varied, although most (like many  
318 of our genes) exhibited broad patterns of either general increase or general decrease  
319 over time (Fig. 4A). This suggests variable cellulose biosynthesis dependent on  
320 developmental stage.

321           The full biosynthetic pathways for sulfated fucans and alginate in brown algae  
322 are still uncharacterized, although there is progress (38). Following these proposed  
323 pathways, we found several genes (discussed below) putatively corresponding to  
324 enzymes in both sulphated fucan and alginate biosynthesis.

325           For sulfated fucans, a total of 56 putative homologs for the following enzymatic  
326 genes were identified: two L-fucokinases, one GDP fucose pyrophosphorylase, three  
327 GDP-mannose 4, 6-dehydratases, one GDP-4-keto-6-deoxy-D-mannose epimerase-  
328 reductase, four GDP-mannose 4,6-dehydratases, thirteen fucosyltransferases, and  
329 thirty-two sulfotransferases (five of which were homologous to carbohydrate  
330 sulfotransferases, Table S1.). Of these, only 14 were statistically inconsistent with  
331 constant expression over time ( $q$ -value  $< 10^{-4}$ ) and appear in Fig. 4B; full gene list in  
332 Table S1.). When examining the DE genes we could conclude the following: enzymes  
333 leading to the production of GDP-fucose showed both slight upregulation and  
334 downregulation during embryo development. Fucosyltransferase expression pattern  
335 varied depending on the gene, with three genes showing up-regulation in the later  
336 developmental stages. Both carbohydrate sulfotransferases showed a higher  
337 expression in the early stages (7H and 1DAF) which may be related to the cues of  
338 sulfated fucans required for both zygote polarity and adhesion (39–41).

339           Interpretation of gene expression in terms of the sole production of sulphated  
340 fucans is challenging to achieve here; most pathways have not been characterized in  
341 brown algae. Even though most biosynthetic pathways are not yet characterized in  
342 brown algae, GDP-fucose might indeed be a component of multiple metabolic  
343 pathways. In plants, GDP-fucose is found as a component of glycan structures such  
344 as N- and O-linked glycans, xyloglucans, pectins and arabinogalactan proteins (AGPs)

345 (67–71). Some of these structures have been also found in brown algae, such as  
346 AGPs (72). In addition, transcript levels may not reflect levels of protein products (and  
347 enzyme activity), and such a difference has been previously reported to occur in the  
348 brown alga *Saccharina japonica* (73).

349 From the alginate biosynthesis pathway, , a total of 14 putative homologs were  
350 found: five putative mannose-6-phosphate isomerases, four phosphomannomutases,  
351 and five GDP-mannose-6-dehydrogenases (Table S1.). As with the sulphated fucan  
352 biosynthetic homologs, only some varied in expression, and these appear in the left  
353 half of Fig. 4C. Isomerases and GDP-mannose-6-dehydrogenases showed higher  
354 expression in early embryo development, whereas phosphomannomutases had  
355 higher expression levels at 3 and 10 DAF (Fig. 4C). Alginate pathway products may  
356 also be used in other biosynthetic pathways; for instance, GDP-mannose can be a  
357 substrate for N-linked glycans in plants (74), as well as a substrate for sulfated fucan  
358 biosynthesis in brown algae; again, interpretation of expression is not completely  
359 straightforward.

360 The modification of alginate to alter stiffness, and the enzymes responsible, is  
361 most relevant to our data presented thus far. Once alginate is produced, it can be  
362 epimerized by mannuronan C5-epimerases (MC5Es), leading to changes in alginate  
363 gelling (75). We identified 59 putative MC5Es in our transcriptome (Table S1) of which  
364 35 had non-constant expression (right half of Fig. 4C). These showed variability in  
365 expression patterns, but several genes displayed high expression early in embryo  
366 development and several had later peaks (Fig. 4C). To date, a number of bacterial  
367 genes encoding MC5Es have been discovered and the exact functions of some of  
368 these enzymes (their patterns of epimerization) have been investigated (76,77). It is



369 likely that each epimerase found here has a specific epimerization pattern and is  
370 required in different developmental stages, contributing to differential cell and tissue  
371 expansion. Further analysis of these newly identified putative epimerases will prove  
372 essential in understanding their role in *Fucus* embryo development, wall stiffness, and  
373 putative influence on cell growth behavior.

## 374 Discussion

### 375 **An interplay between *Fucus* embryo wall mechanics and biochemistry on a** 376 **cellular level**

377         During embryogenesis, fucoid embryos have to coordinate a series of important  
378 developmental steps in order to ultimately create their adult body plan. Starting with  
379 polar axis formation and the first asymmetrical cell division, the division between the  
380 thallus and rhizoid is set. Manipulating these two events can heavily influence the  
381 growth of young embryos (50,78,79). The different growth phases we observed in the  
382 embryo provided an excellent model to examine the basis of organ and cell growth in  
383 the brown algal lineage, a highly diverse group of organisms that have only barely  
384 been explored.

385         Our data correlate wall mechanics and alginate biochemistry to cell expansion  
386 in the *Fucus* embryo. We report that at 3 DAF, the *Fucus* embryo displays differential  
387 growth behavior between the thallus and the rhizoid: the thallus is not expanding but  
388 is undergoing cleavage-type cell divisions while the rhizoid is rapidly elongating. This  
389 differential cell expansion behavior correlates with cell wall stiffness: the expanding  
390 rhizoid has a less stiff cell wall. Finally, both expansion and stiffness were correlated  
391 with alginate biochemical epitopes: less expanding cells, with stiffer walls, had more

392 epitope signal from G-rich alginate epitopes; expanding rhizoid cells were less stiff and  
393 had higher MG-rich epitope signal for alginate. These data show that cell expansion  
394 in *Fucus* embryos is likely limited by cell wall mechanics, underlain in part by alginate  
395 biochemical modification by mannuronan C5-epimerases.

### 396 **The cell wall during *Fucus* embryo development**

397         The cell walls of 24h old *Fucus* embryos consist of ~ 60% alginate, 20% fucans,  
398 and 20% cellulose (20). Cellulose is the load-bearing polysaccharide in plants and  
399 algae and it has been reported that the arrangement of the cellulose microfibrils is  
400 correlated with the direction of the cell expansion in both lineages (80–84). In the  
401 *Fucus* zygote, cellulose has been suggested to act as a strengthening component as  
402 its low signal detected during germination corresponds to the growth initiation (85).  
403 Even though it may be involved in regulating anisotropic expansion, cellulose may not  
404 be a main contributor to the mechanical properties observed here, which has also  
405 been hypothesized for *Ectocarpus* (86).

406         In this study we have identified 12 putative cellulose synthase homologs  
407 expressed during embryo development in *Fucus*; further exploration of these genes,  
408 their products, and their roles in cellulose synthesis will be crucial to understanding  
409 how cellulose contributes to algal development. It is possible that different cellulose  
410 synthases are associated with distinct developmental processes, as has been shown  
411 in other walled organisms such as *Physcomitrella*, *Brachypodium*, and maize (87–89).  
412 In addition, we have identified both CESA and CESA-like homologs; CESA-like  
413 proteins in plants are involved in callose biosynthesis. Recent work indicates that  $\beta$ -  
414 1,3-glucans appear to be present in *Fucus* cell walls and they may be involved in  
415 callose biosynthesis (90). We must note that the major limitation here is the lack of

416 molecular genetic tools in brown algae for forward genetic analyses of gene-  
417 phenotype relationships.

418 Sulfated fucans have been linked to zygote adhesion and stress tolerance  
419 (41,52), but have also been suggested to strengthen the tip-growing rhizoid during  
420 elongation (91). In our data set, we identified several possible homologs involved in  
421 sulfated fucan biosynthesis whose exact roles deserve further exploration. In addition,  
422 we identified two putative carbohydrate sulfotransferases which are strong candidates  
423 for the final addition of sulfate to cell wall fucans. Exploration into these genes would  
424 be essential for understanding the role of sulfated fucans in embryo development and  
425 beyond.

426 The biosynthesis pathway of sulfated fucans did not show a clear pattern of up-  
427 or down-regulation during embryo development. We did, however, find an interesting  
428 observation; the *FucSerDN35869c0g1i2* gene was found to be highly homologous to  
429 both GDP fucose pyrophosphorylase (AUN86413.1, 93.6% identity) and GDP-4-keto-  
430 6-deoxy-D-mannose epimerase-reductase (Ec-01\_003130.1, 94% identity). This  
431 observation could relate to the dual function of a single enzyme in the fucan pathway,  
432 although this is hard to confirm with only the transcriptome data generated here. There  
433 have been reports of other enzymes in the wall biosynthesis that are thought to  
434 perform a dual activity such as mannose-6-phosphate isomerase which could perform  
435 the function of mannose-1-phosphate guanylyltransferase (92). The amount of  
436 currently available molecular data on brown algal species is very scarce. These data  
437 further emphasize the need to continue exploring the brown algal lineage to be able  
438 to discern these 'dual' homologies and gain a better understanding of algal metabolism  
439 and their biosynthesis pathways.

440 Alginate has previously been reported to have an important mechanical role  
441 and has the ability to change the mechanical properties of materials depending on the  
442 formation of calcium bridges between guluronic acid-rich areas (21). The data here  
443 suggest that the G-rich alginate (as detected by BAM10) is more prevalent in the non-  
444 expanding thallus cells, whereas the 'softer' MG-rich alginate (as detected by BAM7)  
445 is found more in the actively expanding rhizoid area. Similar to the results from our  
446 study, a lower abundance of G- rich alginate was detected in the actively expanding  
447 cells of *Adenocystis utricularis* (93).

448 The alginate biosynthesis pathway has not yet been fully described in the brown  
449 algal lineage. However, a few genes homologous to bacterial genes involved in this  
450 pathway have been identified in *Ectocarpus* and *Saccharina* (38,61,92). In the *Fucus*  
451 *serratus* transcriptome, some of the genes seem to have a few more homologs. This  
452 might be due to the fact that our transcriptome is fragmented and they are actually a  
453 single gene, or there are multiple homologs that have the same function in *Fucus*.  
454 Furthermore, in the *Ectocarpus* genome, there was no homolog for mannose-1-  
455 phosphate guanylyltransferase (MPG) enzyme which catalyzes the reaction from  
456 mannose-1-phosphate to GDP-mannose. We have found a single homolog of the  
457 MPG in the *Fucus* transcriptome, matching with the *Arabidopsis* mannose-1-  
458 phosphate guanylyltransferase 1 (CYT1; 51%). It has been recently reported in  
459 *Saccharina japonica* that another enzyme has the ability to act as an MPG (92).  
460 However, the enzyme they report is homologous to a *Fucus* Trinity gene in our study  
461 (FucSerDN37605c0g2i1) which is different from our newly identified putative MPG  
462 (FucSerDN28326c0g1i1). This enzyme was not sufficiently expressed to be  
463 considered in the downstream gene expression analysis. However, we are currently  
464 working on generating a *Fucus* genome; this will enable us to look into more detail at

465 these ambiguous genes that have not been identified in other brown algae, but have  
466 been identified in our analysis.

467 Here we found 62 homologs of mannuronan C5-epimerases with several  
468 expression patterns during development. Previous molecular analyses have revealed  
469 candidates for 31 genes in *Ectocarpus siliculosus* (Michel et al., 2010), 105 in  
470 *Saccharina japonica* (61), 6 in *Laminaria digitata* (94), and 31 in *Undaria pinnatifida*  
471 (95). The variety of potential epimerases found in the species of the brown algal  
472 lineage suggests that brown algae might have evolved the ability to ‘tweak’ the alginate  
473 structure to finer detail than what is observed in bacteria. The variability in the  
474 expression pattern in our dataset might reflect this hypothesis. However, the exact  
475 function of almost all of these epimerases remains unknown. Two of the currently  
476 known algal MC5Es have been functionally described: in *Saccharina japonica*, a  
477 recombinant epimerase (SjC5-VI) epimerizes M to G (96). In *Ectocarpus siliculosus*, a  
478 mannuronan C5-epimerase MEP13-C5 is thought to epimerize block MM regions,  
479 although its exact function is not completely clear (97).

480 The cell wall architecture in fucoid zygotes has previously been observed by  
481 TEM. These studies described that during zygote development, the wall consisted of  
482 a single fibrous layer and, as development progresses, several wall layers were  
483 observed (86,91,98,99). Between these layers, the spatial arrangement of the fibrils is  
484 different, and a recent study has shown that each of these layers seems to have a  
485 different alginate composition, which might have different physicochemical properties  
486 (100). In addition, this study has shown that removing calcium from the growth medium  
487 seems to affect the alginate composition and wall integrity, suggesting that, similarly  
488 to our findings, alginate might play a mechanical role in the brown algal cell walls.

489 **Transcriptome-wide gene expression changes follow known developmental**  
490 **progression**

491         There have been several reports on transcriptomic analyses in brown algae  
492 (95,101–109); this study, however, represents the first temporal gene expression  
493 analysis of brown algal embryo development. Our transcriptome covers 4  
494 developmental stages during *Fucus* embryogenesis starting just after fertilization and  
495 ending at 10DAF. In our gene ontology analysis, several GO terms were enriched in  
496 specific time points. In the early development (7h and 1DAF) highly expressed genes  
497 are related to cell cycle, cytoskeleton and chromosome segregation. These  
498 enrichments align with the developmental processes observed in early *Fucus*  
499 embryogenesis: the *Fucus* zygote exhibits spatial distribution of cellular components  
500 that are necessary for embryo polarity and the first asymmetrical cell division by  
501 activating the cytoskeletal machinery and calcium fluxes (26,34,62,63).

502         After the initial cell divisions, we show that at 3DAF there is a high expression  
503 of genes related to protein metabolism and translation, suggesting that the embryo  
504 activates its translational machinery around this stage. This is further supported by a  
505 previous study from Galun and Torrey (1969) that demonstrated blocking protein  
506 synthesis at 3DAF led to blockage of apical hair production and thallus expansion.  
507 Another observation from our transcriptome-wide analysis was the enrichment of  
508 photosynthesis-related genes at both 3 and 10DAF. This activation of photosynthesis  
509 genes correlates well with physiological and biochemical observations previously  
510 reported; zygotes can photosynthesize immediately, but the intensity of  
511 photosynthesis increases in several days old embryos (65,66,110–112). At 10DAF,  
512 the GO term enrichment is similar to 3DAF indicating that the ‘mature’ gene expression  
513 pattern becomes evident very early in fucoid embryo development. Tarakhovskaya et

514 al. (111) have shown that the metabolism of embryos 6-9DAF is similar to adult algae.  
515 Since RNA abundance is not always directly correlated with protein levels, it is likely  
516 that the initiation of gene expression may occur before changes in metabolism would  
517 be evident.

518 To conclude, our transcriptome analysis has shown that gene expression  
519 follows the progression of embryogenesis, with GO terms related to chromosome  
520 segregation, cytoskeleton activity and cell cycle being enriched during active cell  
521 polarization and first cell division, and protein synthesis, translation and  
522 photosynthesis being enriched in later stages, as the embryo starts maturing. We fully  
523 expect that there is a wealth of data within the transcriptome that will prove relevant  
524 and useful to the community in future studies.

## 525 Materials and methods

### 526 Sample collection and processing

527 Adult *Fucus serratus* samples were collected in Rottingdean (East Sussex,  
528 United Kingdom) during winter months between November 2015 and May 2017. After  
529 collection, they were transported in seawater to the Sainsbury Laboratory (Cambridge,  
530 UK) and kept at 4°C. Fertile adult samples were rinsed with tap water and processed  
531 as follows: each receptacle was first identified as a male or female by checking for  
532 antheridia or oogonia, respectively. The receptacles were separated, wrapped into  
533 damp tissue paper and aluminum foil (darkness) and kept at 4°C for further use up to  
534 2 weeks.

## 535 **Fertilization**

536 The female receptacles were taken out of the 4°C, washed, cut into small  
537 segments, placed into beakers with filter-sterilized artificial seawater (ASW, Tropic  
538 Marin Sea Salt; Tropic Marin, Germany) and left to release the eggs for approximately  
539 1 hour. The tissue was then removed and the egg mixture was filtered through a 100  
540 µm mesh to eliminate oogonia and leftover pieces of adult tissue. The male  
541 receptacles were then taken out of the 4°C, washed, cut into small segments and  
542 added to the egg mixture. After 15 minutes, the male segments were removed and the  
543 egg/sperm mixture was filtered through a 40 µm mesh to remove the sperm. The  
544 fertilized eggs were then placed in droplets of ASW on Multitest 8-well slides (Vector  
545 Laboratories, USA) and placed in the incubator. After allowing them to settle for 6  
546 hours, the eggs were flooded with ASW to completely cover the slides and cultured  
547 under a unilateral light overnight followed by 12:12 hour day-night cycle, 16°C, 60 µmol  
548 m<sup>-2</sup> s<sup>-1</sup>.

## 549 **Light microscopy and measuring length/growth rate**

550 To measure their growth in time, the embryos were cultured under the  
551 previously mentioned conditions and imaged using a VHX 5000 microscope (Keyence  
552 Ltd, UK) for a proscribed number of consecutive days, depending on the experiment.  
553 The images were then processed using ImageJ (113) software where the length of the  
554 embryos was measured (drawing a segmented line along the middle of the embryo  
555 body from the tip of the rhizoid until the top of the thallus). Growth rate was determined  
556 via the difference between sequential daily lengths using the formula  $RGR =$   
557  $\frac{\ln(L2) - \ln(L1)}{t2 - t1}$ ; where L2 and L1 are embryo lengths at time t2 and t1 (114).



## 558 **Quantifying cell divisions**

559 *Fucus* embryos were cultured on slides and one slide was taken daily for  
560 staining and confocal imaging. The embryos were stained with Calcofluor White  
561 (18909, Sigma-Aldrich, USA) for 5 minutes, rinsed thoroughly with ASW and imaged  
562 under a Leica SP8 confocal microscope (Leica Microsystems, Germany; ex = 370 nm,  
563 em= 420 nm). Confocal images were then processed using MorphoGraphX software;  
564 [www.MorphoGraphX.org](http://www.MorphoGraphX.org); (53)) to extract the information about individual cell surface  
565 areas per sample. Briefly, the z-stack output from the confocal microscope was loaded  
566 into the MorphoGraphX software as a .tif. The images were first blurred by averaging,  
567 after which a global shape of the object was created. Following this, the surface was  
568 extracted from this shape as a mesh formed of triangles which were then subdivided  
569 and smoothed. The confocal fluorescence signal was then projected onto the mesh  
570 after which individual cells were seeded and segmented. Surface areas of each of the  
571 cells were analyzed and surface area heat maps were created for individual embryos.  
572 Further analysis was conducted using the statistical software R ([http://www.R-](http://www.R-project.org/)  
573 [project.org/](http://www.R-project.org/)).

## 574 **Identifying tip growth with Calcofluor White staining**

575 To identify the incorporation of new material into the embryo tip, embryos were  
576 stained with Calcofluor White (18909, Sigma-Aldrich, USA) for 5 minutes, rinsed and  
577 imaged under a Leica SP8 confocal microscope. The same embryo was imaged again  
578 for two consecutive days to locate the incorporation of new wall material.

579 **Atomic force microscopy (AFM)**

580 Embryos were fertilized, cultured and grown as described above on glass slides  
581 and used when reaching the stage of interest: 1DAF, 3DAF or 10DAF. They were  
582 covered with a droplet of water and placed under the atomic force microscope. The  
583 AFM data were collected using a NanoWizard AFM with a CellHesion (JPK  
584 Instruments AG, Germany). The measurement of wall properties was done placing the  
585 embryos in ASW. A 0.5 N/m stiffness cantilever with a 10 nm pyramidal tip  
586 (Nanosensors, PPP-CONT, Windsor Scientific Ltd., UK) was used with an applied  
587 force of 150nN (setpoint). The stiffness of all samples was determined by indenting  
588 with the tip over the whole embryo in 100  $\mu\text{m}$  x 100  $\mu\text{m}$  squares with the indentation  
589 depth of between 1 and 3  $\mu\text{m}$ . Each force-indentation curve was processed using the  
590 JPK Data Processing software (JPK Instruments AG, Germany) to determine the  
591 stiffness per indentation point. Stiffness was presented as a heat map; areas of  
592 interest were extracted for quantitative analysis by picking points in a line along the  
593 middle of the embryo, from the tip of the rhizoid to the top of the thallus, using a custom  
594 MatLab-based script (available upon request).

595 **Alginate immunolocalization**

596 Embryos were fertilized and cultured as above on multi-test 8-well slides  
597 (Vector Laboratories, USA) and taken when reaching the stage of interest (1, 3, and  
598 10DAF). They were fixed overnight in ASW containing 2% formaldehyde and 2.5%  
599 glutaraldehyde and washed 3 times for 15 minutes with ASW, followed by a rinse in  
600 phosphate buffered saline (PBS; 2.7 mM KCl, 6.1 mM  $\text{Na}_2\text{HPO}_4$ , and 3.5 mM  
601  $\text{KH}_2\text{PO}_4$ ). The samples were incubated in a blocking solution of 5% milk for 2 hours.  
602 They were then rinsed with phosphate buffered saline and incubated in the 60  $\mu\text{l}$  of

603 1/5 (in 5% milk) monoclonal primary antibody for 1.5 hours. After the incubation, the  
604 slides were washed with PBS 3 times for 5 minutes each, followed by the incubation  
605 in the 60  $\mu$ l of 1/100 (in 5% milk) IgG-FITC secondary antibody (F1763, Sigma-  
606 Aldrich). This was followed with a 5x5 minute wash in PBS, after which the samples  
607 were mounted in Citifluor (Agar Scientific, UK), covered with a coverslip, sealed and  
608 imaged under a Leica SP8 confocal microscope (Leica Microsystems, Germany;  
609 ex=490nm, em=525nm)

### 610 **RNA extraction, cDNA synthesis, and RNA sequencing**

611 Total RNA of 3 biological replicates of embryos from 7 hours (H), 1 day (D), 3  
612 days (D) and 10 days after fertilization (DAF) was extracted using the PureLink Plant  
613 RNA Reagent following manufacturer's instructions. The integrity of RNA samples was  
614 checked by Agilent 2100 Bioanalyzer (Agilent Technologies, USA) and the quantity  
615 was assessed using NanoDrop 1000 spectrophotometer (Thermo Fisher Scientific,  
616 USA) and Qubit 2.0 Fluorometer with RNA High Sensitivity assay (Thermo Fisher  
617 Scientific). cDNA libraries were generated using TruSeq LT DNA Sample Prep Kit  
618 (Illumina, USA) according to the manufacturer's instructions with the following  
619 modifications: the beads used were home-made SeraPure beads (115) instead of  
620 AMPure XP beads. The library sequencing was performed on a NextSeq 500 using  
621 paired-end sequencing (2x76 cycles) with NextSeq 500/550 High Output v2 kit  
622 (Illumina, USA).

### 623 **De novo transcriptome assembly and GO term analysis**

624 A total of 65-160 million paired-end reads (75x75bp) were generated for each  
625 of the 12 sequenced libraries (14 samples in total; sequencing was done on two  
626 separate flow cells and to remove possible sequencing bias, two libraries were

627 sequenced in both runs). To reconstruct *F. serratus* transcriptome, samples were  
628 pooled together from all four time-points (7H, 1D, 3D, and 10DAF). Initial read quality  
629 assessment was done with FastQC (Babraham Bioinformatics,  
630 [www.bioinformatics.babraham.ac.uk/projects/fastqc/](http://www.bioinformatics.babraham.ac.uk/projects/fastqc/)). Adaptors were removed using  
631 CutAdapt (116). Reads were further subjected to quality control using Trimmomatic  
632 (minimum read length = 60). The quality parameters for the library were assessed  
633 using FastQC. The resulting filtered reads were subjected to *de novo* assembly with  
634 Trinity (trinity v2.4.0) on a high-RAM server with minimal k-mer coverage = 2 and k-  
635 mer length = 25. *In silico* read normalization was used due to a large number of input  
636 reads, in order to improve assembly efficiency and to reduce run times (117). Trinity  
637 analysis resulted in 127,489 transcripts, accounting for 70,824 nominal genes with an  
638 average length of 780bp. It was suspected that the Trinity assembly yielded a  
639 significant amount of duplication beyond the isoform level (genes are called as nominal  
640 even with a very high sequence similarity) and that many genes were fragmented. To  
641 improve the assembly and overcome the fragmentation issue, Salmon and CD-HIT  
642 were used to collapse the Trinity genes into larger unigene groups (118,119). Analysis  
643 of the percentage of unigene collapse with mappability started severely decreasing  
644 when the genes were collapsed for more than 80% of nucleotide identity (Fig. S4). The  
645 level of 80% was then chosen as the new database for unique genes. Salmon filtering  
646 method resulted in 42,176 contigs, with the length ranges of 201 to 17,616 nt, and a  
647 mean length of 1,163 nt. It was predicted that 24,691 genes had ORFs, and 67%  
648 (16,597) shared sequence homology with a representative of the NCBI  
649 database. Gene abundances were analyzed following the general outline of R  
650 Bioconductor package Sleuth (120). All DEGs were then used for GO term analysis  
651 in the Gene Ontology database (<http://geneontology.org/>). To remove redundancy in

652 the number of similar GO terms and choose a representative subset of the terms we  
653 used the REVIGO algorithm with allowed similarity of 0.7 and the default SimRel  
654 semantic similarity measure (121). GO terms with p-values  $\leq 0.001$  were defined as  
655 significantly enriched.

## 656 **Acknowledgments**

657 The authors thank Dr. Anna Gogleva and Dr. Sebastian Schornack for their help with  
658 the initial *Fucus* embryo transcriptome assembly and Dr. Thomas Torode for help  
659 learning brown algal cell wall immunolocalizations. We also thank Dr. Paul Knox and  
660 Dr. Cécile Hervé for the gift of BAM antibodies, which are now available at Sea Probes  
661 (<http://www.sb-roscoff.fr/en/seaprobes>). The Braybrook group in Cambridge (UK) was  
662 funded by The Gatsby Charitable Foundation (GAT3396/PR4, S.A.B) and the Ralph  
663 Lewin – F. E. Fritsch Prize Studentship (M.L). The Braybrook group at UCLA is funded  
664 by The Department of Cell, Molecular and Developmental Biology and The College of  
665 Life Sciences (S.A.B); At UCLA this work was majorly supported by the U.S.  
666 Department of Energy Office of Science, Office of Biological and Environmental  
667 Research program under Award Number DE-FC02-02ER63421 and the US  
668 Department of Energy (Biological and Environmental Research (BER), the Biological  
669 Systems Science Division (BSSD); M.L, S.A.B, M.P).

670

671

672 Figures

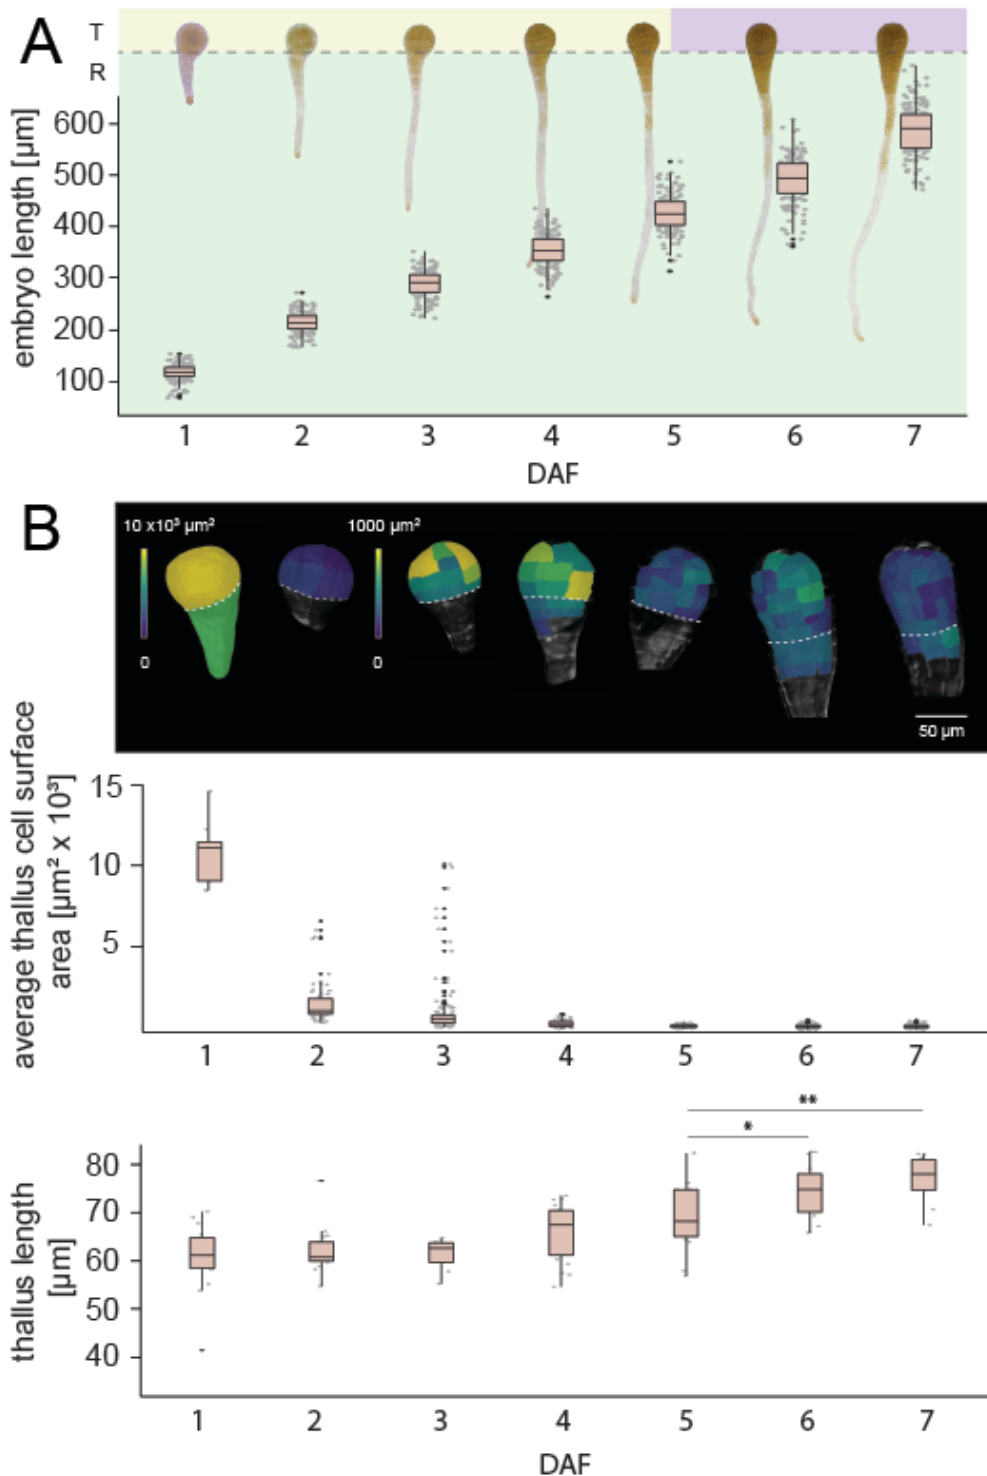

673

674 **Figure 1.** *Fucus* embryo growth dynamics. (A) Representative images of *F. serratus*

675 embryo in the first seven days of development. T - thallus, R - rhizoid. Graph shows

676 the embryo length increase in time. Embryo growth can be divided in three phases:  
677 rhizoid elongation (green), exclusive thallus division only (yellow) and thallus  
678 expansion (purple). Embryos observed, N=150. (B) Temporal quantification of  
679 average surface areas of single cells derived from the initial thallus cell.  
680 Representative heat maps of cell surface areas are depicted first, with graphical  
681 quantification below. Embryos observed, middle panel: N(1DAF)=9; cells  
682 measured=9, N(2DAF)=9; cells measured=62, N(3DAF)=11; cells measured=151,  
683 N(4DAF)=9; cells measured=119, N(5DAF)=8; cells measured=194, N(6DAF)=9; cells  
684 measured=274, N(7DAF)=8; cells measured=274, embryos observed, bottom panel:  
685 N(1DAF) =15, N(2DAF) =17, N(3DAF) =7, N(4DAF) =21, N(5DAF) =15, N(6DAF) =16,  
686 N(7DAF) =10. Significance at \* $p < 0.05$ , \*\* $p < 0.01$  according to the pairwise Student's t-  
687 test (normal distribution, equal variance).

688

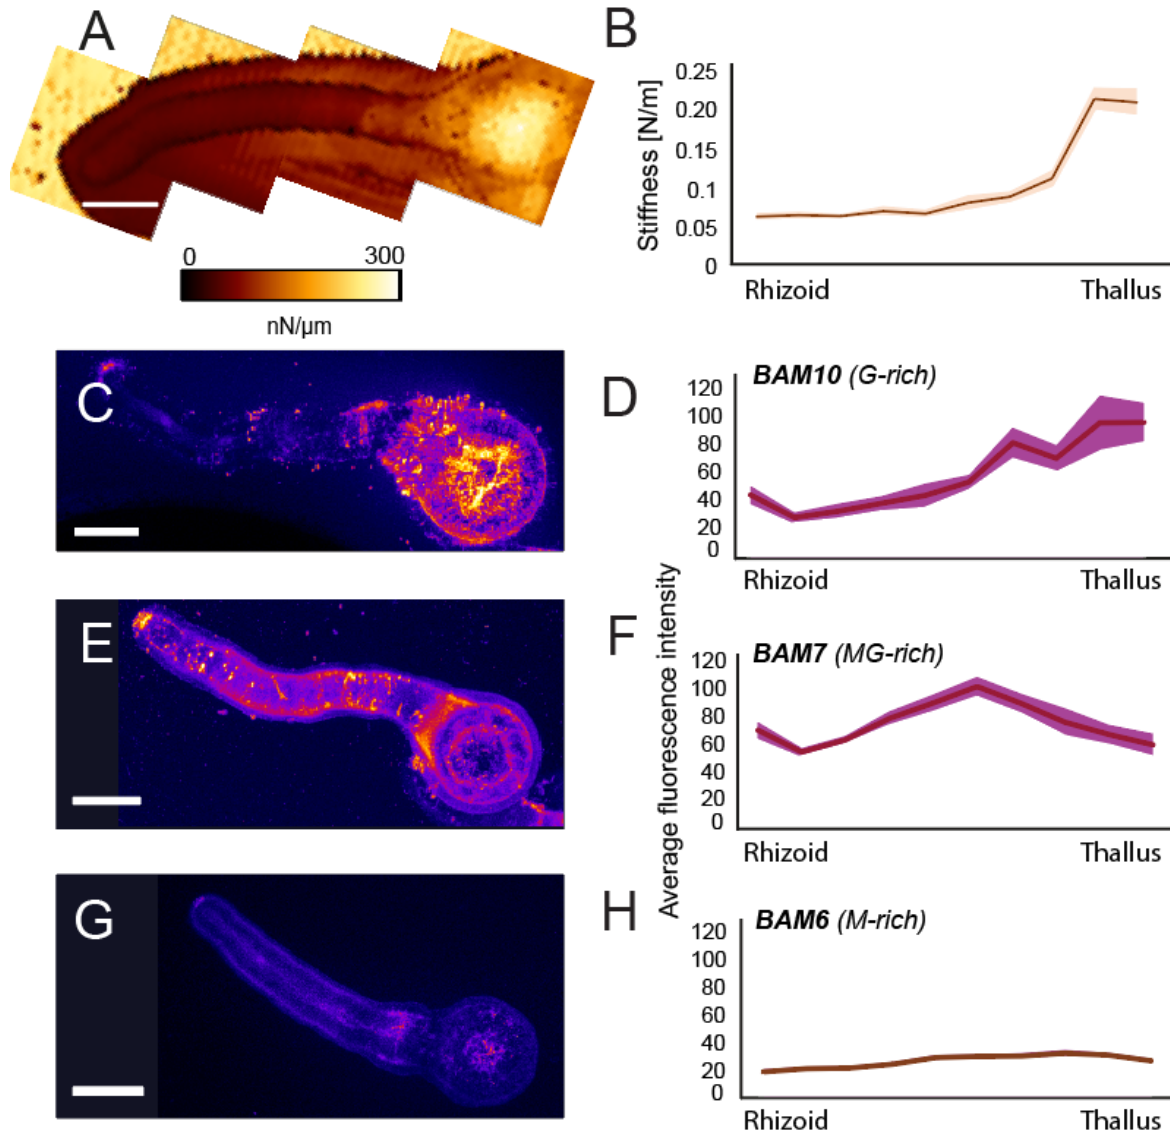

689

690 **Figure 2.** The *F. serratus* embryo displays stiffer cell walls with more G-rich alginase  
691 in the dividing thallus at 3 DAF. (A, B) Embryo stiffness displayed as a representative  
692 map (A) and quantitatively over all samples (n=7) along the embryo length (B). (C-H)  
693 *In muro* immunolocalization of alginase epitopes in 3 DAF embryos. Fluorescence  
694 indicates localization of BAM10 (C,D), BAM7 (E,F) and BAM6 (G,H) binding. (C,E,G)  
695 representative confocal images of immunolocalizations. (D, F, H) Fluorescence  
696 quantification from immunolocalizations along the embryo length, for all samples  
697 analyzed (N(BAM10) = 9, N(BAM7) = 12, N(BAM6) = 21).



698

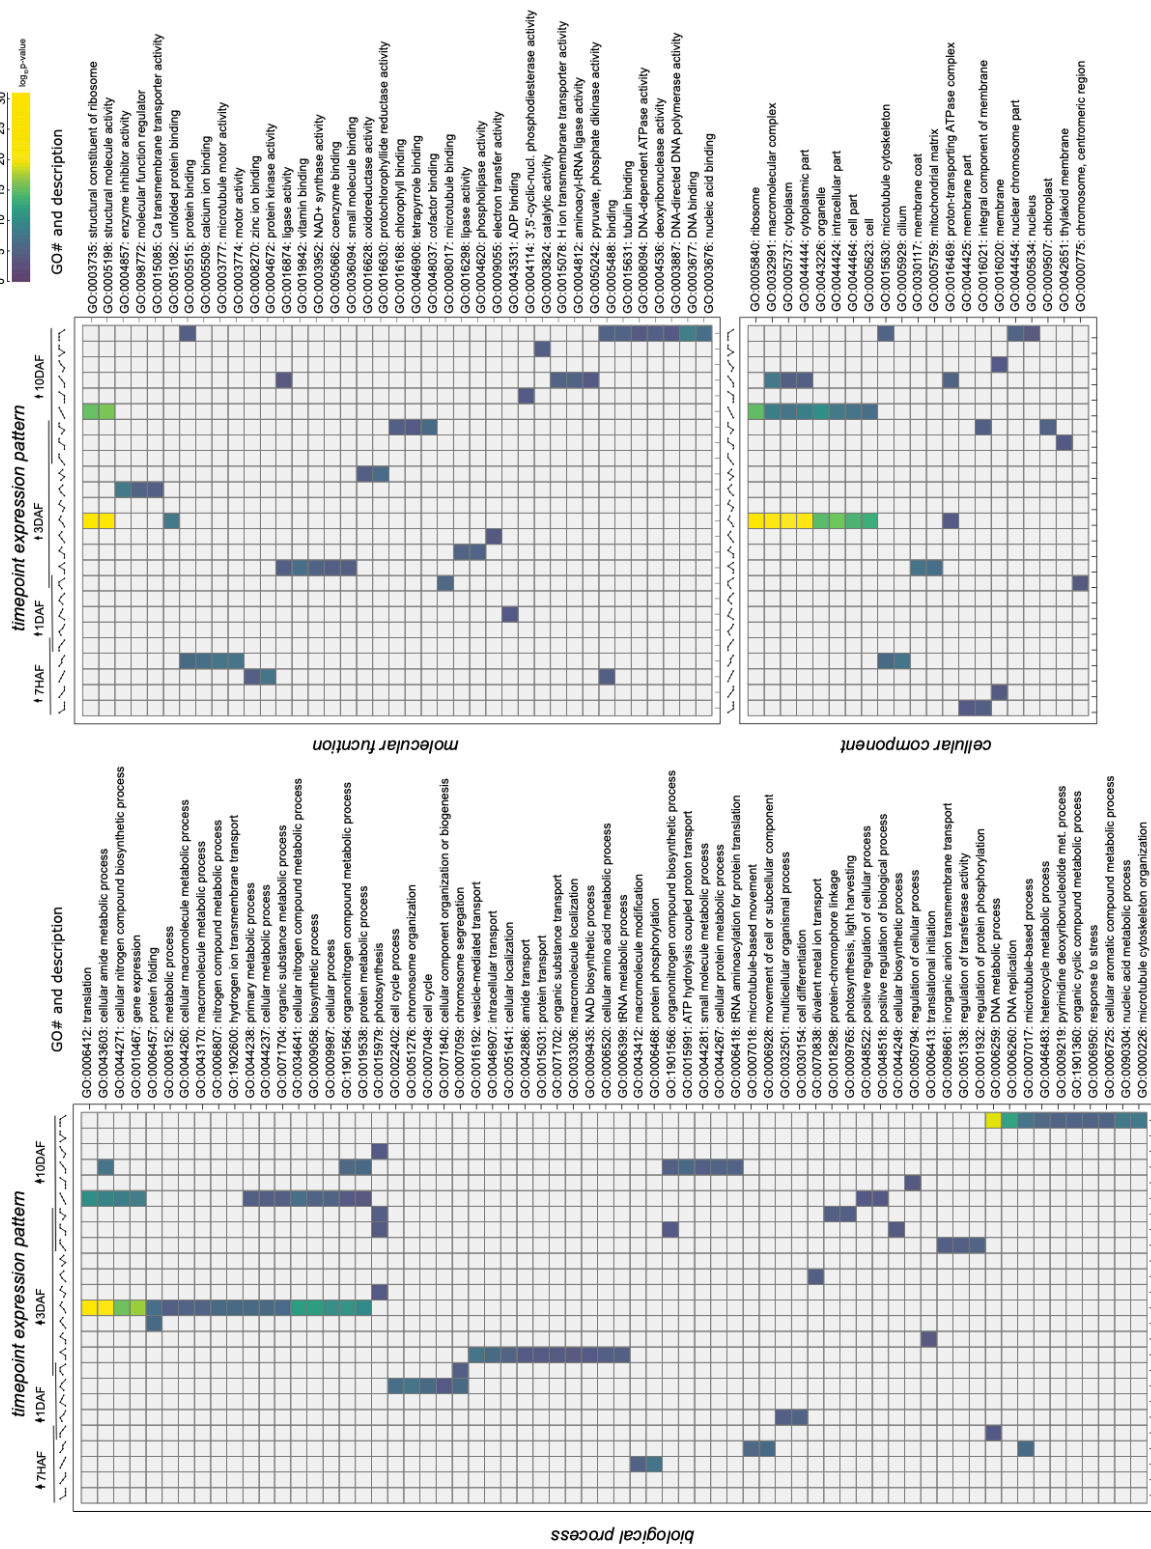

699

700 **Figure 3.** Highlights of Gene Ontology (GO) enrichments in different temporal  
 701 expression patterns. Represented here are terms separated by the GO root term

702 category: Biological Process, Molecular Function, and Cellular Component. X-axis  
703 represents the pattern of developmental expression indicated by spark-lines; 4 dots  
704 connected with a line that changes according to the increase or decrease of  
705 expression with respect to the other time points. Every illustration follows the same  
706 rule: first dot 7 HAF, second dot 1 DAF, third dot 3 DAF, and fourth dot 10 DAF;  
707 enrichment at a specific timepoint is shaded in grey and the overlaps represent  
708 enrichment in both neighboring time points. The  $p$ -value for GO terms  $\leq 0.0001$  is  
709 illustrated in the heat map. For full heat map including all rows and columns and all  
710 terms with  $p$ -value  $\leq 0.0001$ , see Fig. S7.

711

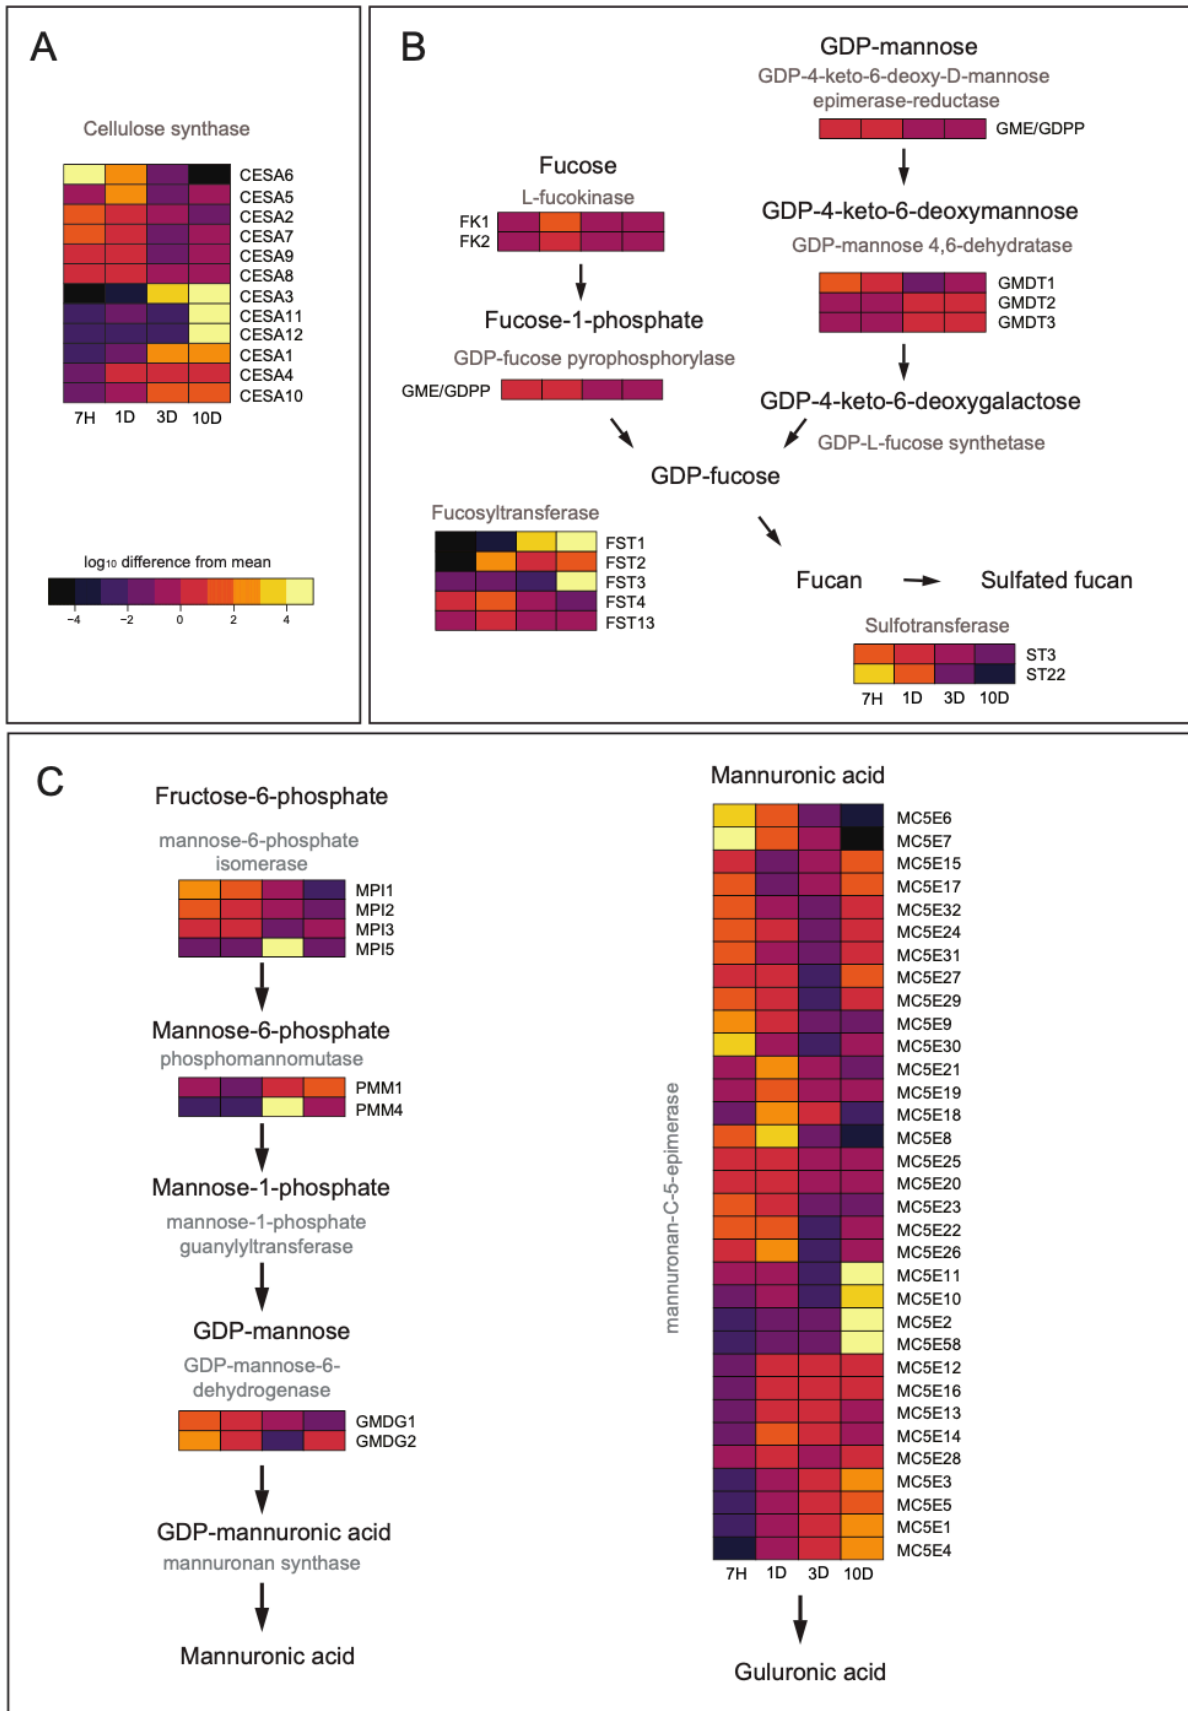

712

713 **Figure 4.** Schematic representation of the biosynthetic pathways of three main  
714 components of the brown algal cell wall: (A) cellulose, (B) sulfated fucans and (C)  
715 alginate, with expression levels of identified genes during *Fucus* embryo development  
716 (1 hour (H), 1 day (D), 3 days and 10 days after fertilization). Identifiers of putative  
717 relevant genes from the *de novo* transcriptome are shown, along with their relative  
718 expression levels across the *Fucus* embryo development timecourse; FK –  
719 fukokinase, GME/GDPP - GDP-4-keto-6-deoxy-D-mannose epimerase-  
720 reductase/GDP-fucose pyrophosphorylase, GMDT - GDP-mannose 4,6-dehydratase,  
721 FST – fucosyltransferase, MPI – mannose-6-phosphate isomerase, PMM –  
722 phosphomannomutases, GMDG - GDP-mannose 6-dehydrogenase, MC5E –  
723 mannuronan C5-epimerase, ST – sulfotransferase, CESA – cellulose synthase  
724 (corresponding Trinity gene names found in Table S1.). Represented here are the  
725 genes with the differential expression in at least a one time-point ( $p\text{-value} \leq 0.0001$ ).  
726 For the full set of putative homologs see Table S1.

727

728

729

730

731 **Supplementary data**

732

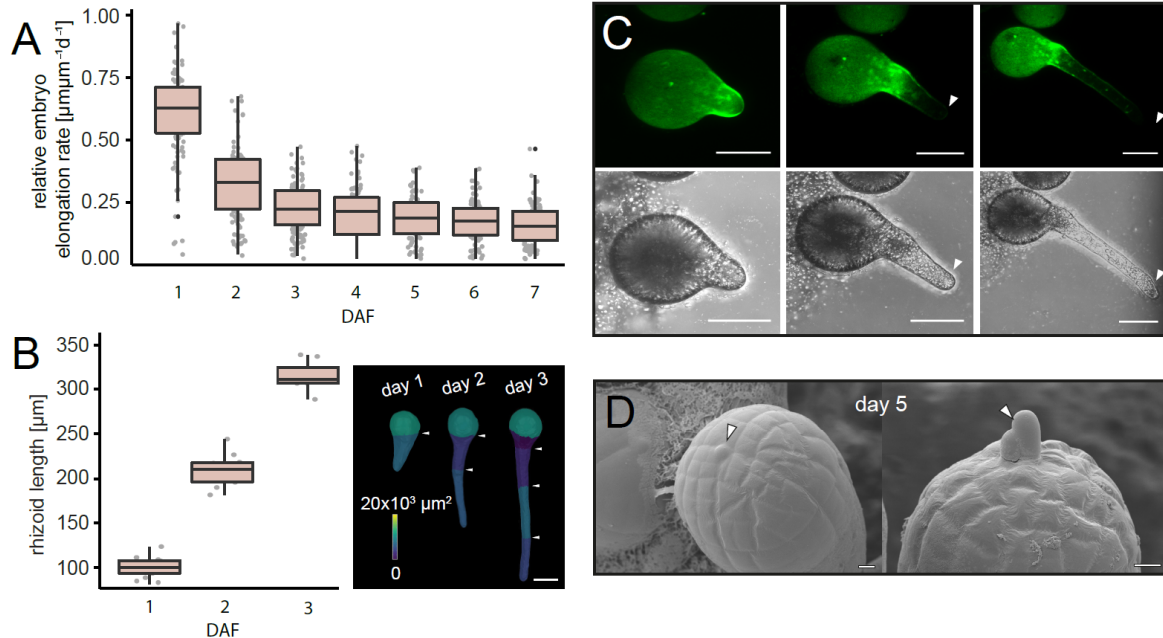

733

734 **Supplemental Figure 1. Rhizoid and thallus growth in the *F. serratus* embryo. (A)**

735 Relative growth rate decreases during the first 7 days of development and becomes

736 constant around day 5. (B) Rhizoid length increases significantly during the first days

737 of embryogenesis; few cell divisions can be observed. Scale bar 50 µm. (C) Calcofluor

738 White staining of the embryo cell wall at 24h after fertilization (AF) after which the stain

739 was removed from the medium. Embryos were imaged 48 and 72h AF. Images

740 represent an embryo with the retained stain and the new part of the unstained wall at

741 the tip (white arrowhead). Bright-field images of the three stages. Scale bar 50 µm.

742 (D) Initiation of apical hairs around day 5 (white arrowheads) indicates the start of

743 active meristematic growth in the embryo thallus. Scale bar 10 µm.

744

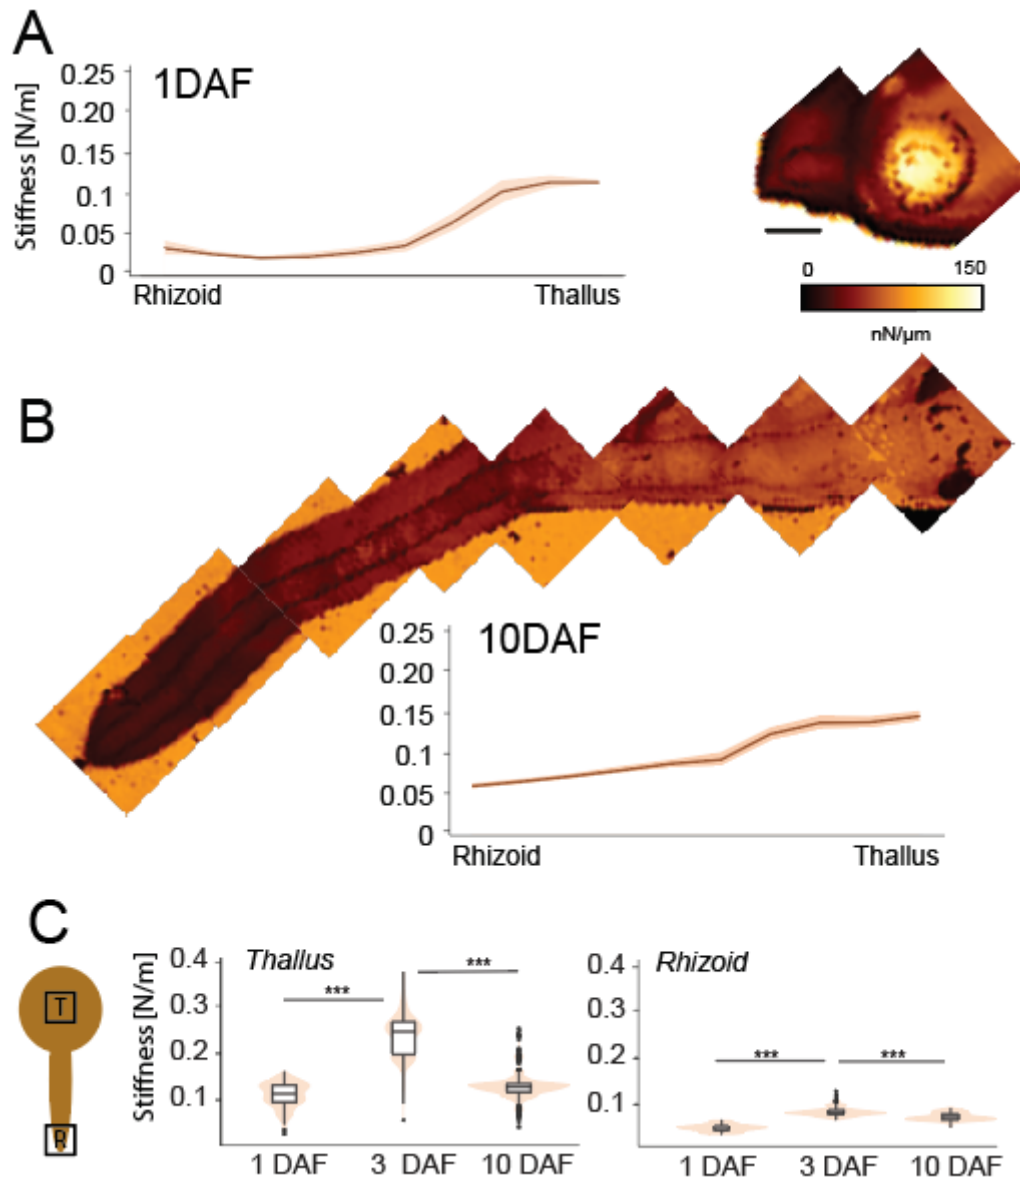

745

746 **Supplemental Figure 2.** Atomic Force Microscopy analysis for 1 and 10 DAF. (A)

747 Stiffness map and corresponding graph for 1DAF (B) Stiffness map and corresponding

748 graph for 10DAF, both indicating rhizoid area as less stiff than the thallus. Scale bar

749 50 μm. (C) Stiffness differences in thallus (A) and rhizoid (B) during embryo

750 development. Thallus cell exhibits the highest stiffness during early cell division stage

751 (3DAF), but decreases after cell expansion takes place (10DAF). In the rhizoid, the

752 stiffness increases in the early development but becomes reduced at later stages.

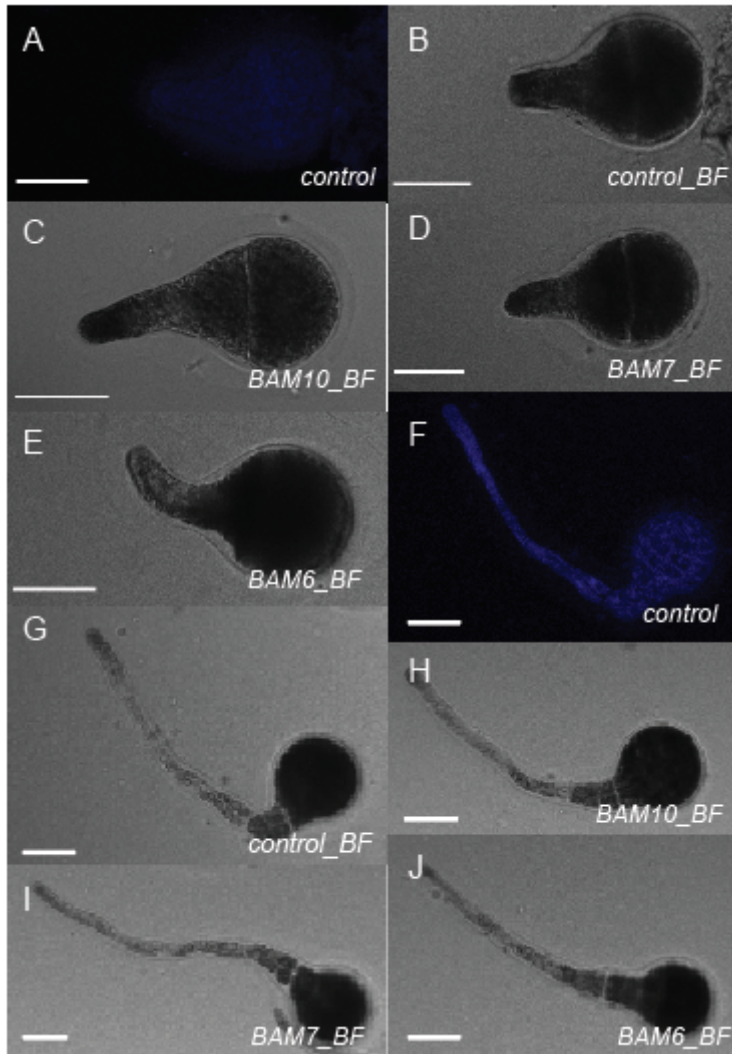

753

754 **Supplemental Figure 3. Control images for alginate immunolocalization.** (A) No  
755 primary antibody 24h AF control, (B-E) Bright-field images of 24h old embryos, (F) No  
756 primary antibody 72h AF control, (G-J) Bright-field images of 72h old embryos. Scale  
757 bar 50  $\mu$ m.

758 **Supplemental Figure 4. CD-HIT clustering reads and the corresponding mapping**  
759 rate. CD-HIT (red) and PSI-CD-HIT (blue). *SEE END OF DOCUMENT.*

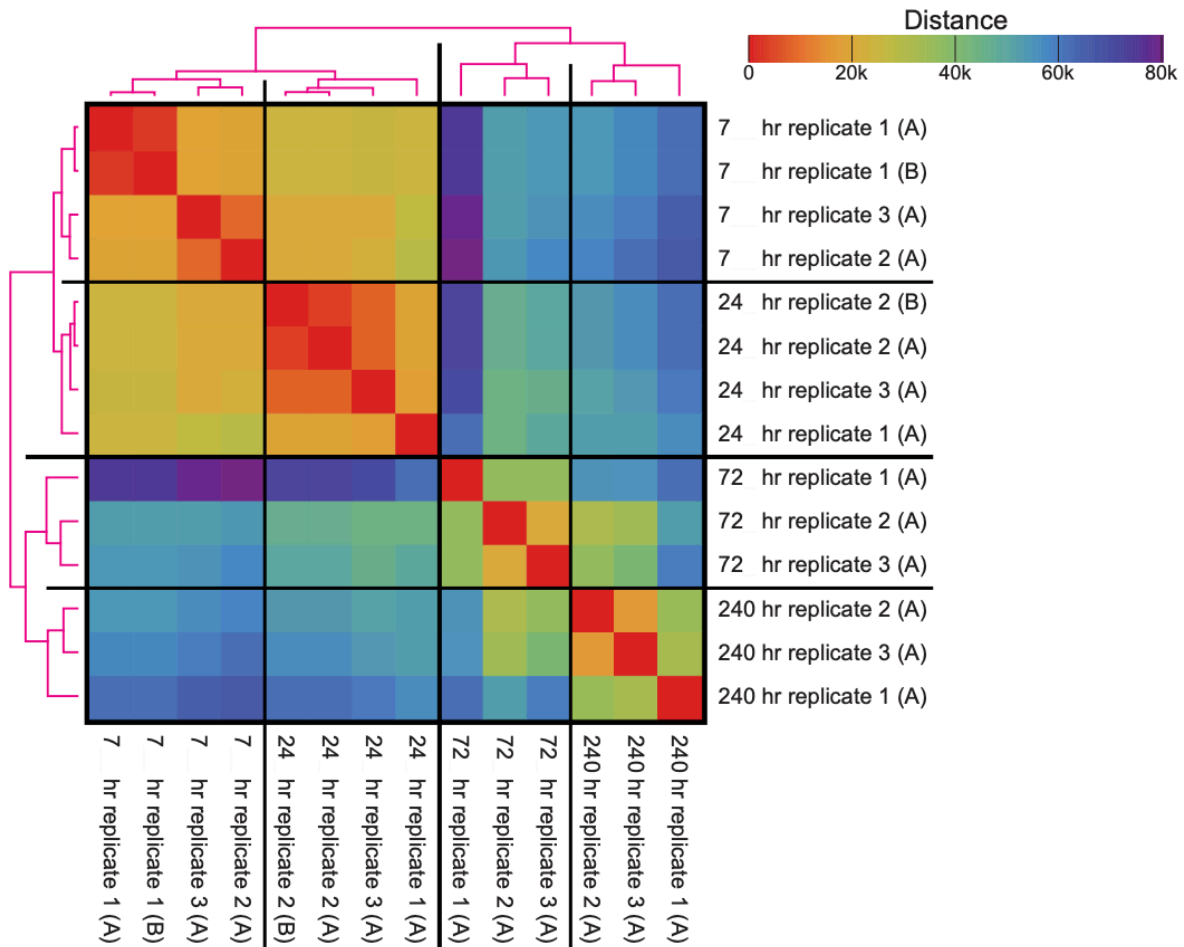

760

761 **Supplemental Figure 5.** Salmon normalized expected reads (14 samples by 72,788  
762 transcripts; two libraries were done in duplicate to assess sequencing bias, see  
763 Materials and Methods), reduced to 27,110 transcripts that have at least one sample  
764 with  $\geq 200$  normalized counts. Transformed by  $\log_2(*+0.5)$ , hierarchically clustered  
765 by Manhattan distance with complete linkage.



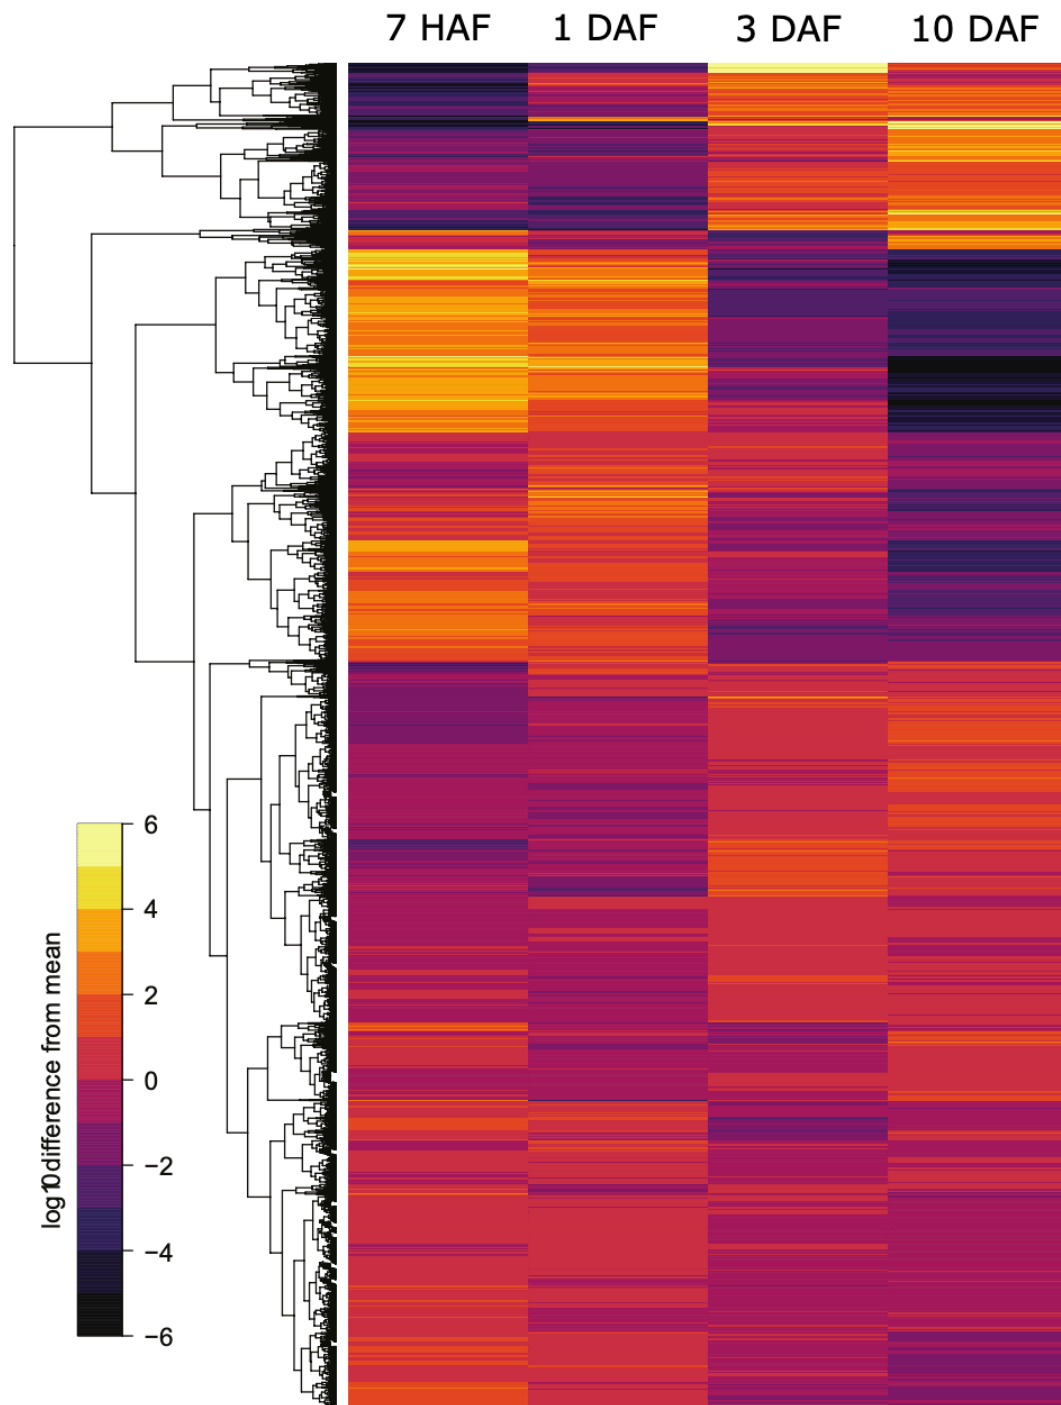

766

767 **Supplemental Figure 6.** Gene expression during *Fucus* embryo development;  
768 depicting all genes differentially expressed in at least one time-point (7HAF, 1DAF,  
769 3DAF, and 10DAF; p-value  $\leq 0.0001$ ).

770 **Supplemental Figure 7.** Heat map of Gene Ontology enrichments; full list of all rows  
771 and columns containing  $p$ -value  $\leq 0.0001$ . *SEE END OF DOCUMENT*

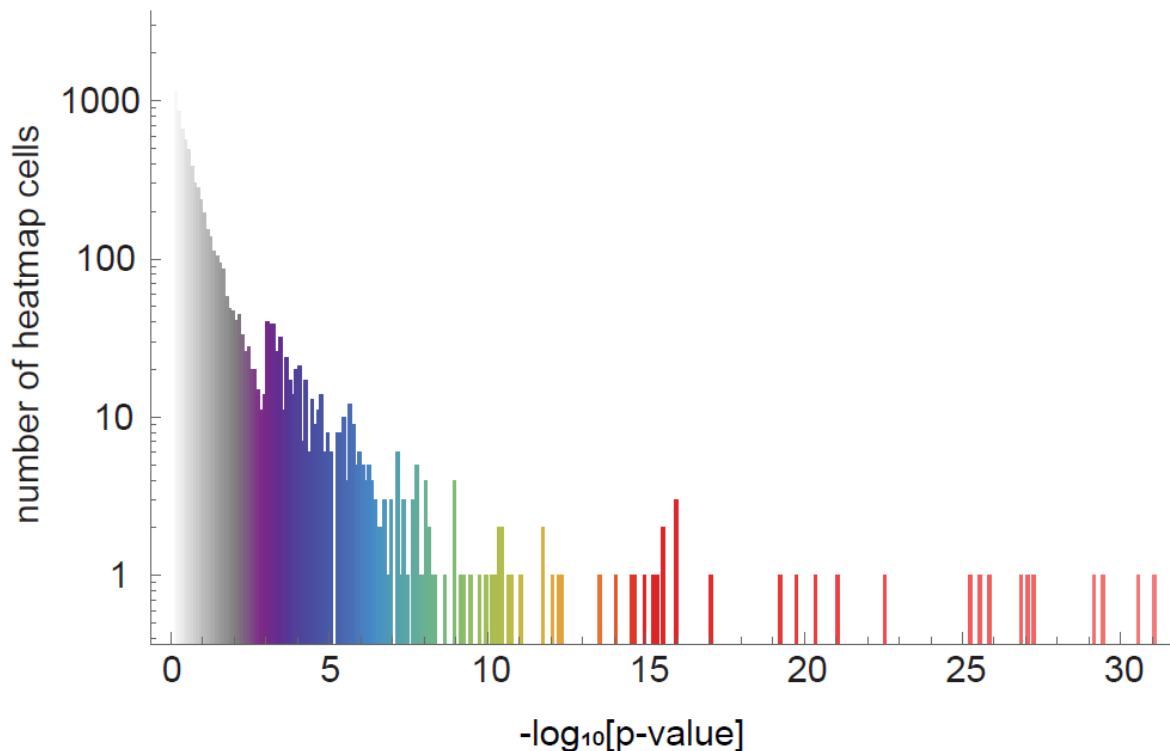

772

773 **Supplemental Figure 8.** Heat map representing GO terms across time classes and  
774 their enrichment significance. There are 74 (time classes) by 381 (GO terms) = 28,194  
775 cells in the heat map and the histogram represents a single value shown in each cell  
776 ( $-\log_{10}$  enrichment  $p$ -value). The x-axis shows bins for the  $-\log_{10}$ [ $p$ -value], the y-axis  
777 shows the number of heat map cells in the bins. Purple to red color refers to the 381  
778 GO terms that are cut down from the 2,339 GO terms enrichment was computed on;  
779  $p$ -value  $\leq 0.001$  in at least one of the 74 time-classes. White and gray colors mark  
780 the GO terms with  $p$ -value  $> 0.001$ .

781 **Supplemental Table 1. Cell wall biosynthesis genes and their expression during**  
782 ***Fucus* embryogenesis.** List of Trinity genes with best NCBI hit or locally performed  
783 BLAST with *Ectocarpus* wall biosynthesis genes against a local *Fucus* transcriptome

784 database. Gene expression levels presented as the deviation from the mean of all time  
785 points with the  $\log_{10}(\text{q-value})$ .

## 786 References

- 787 1. Thompson DW. On growth and form. UK: Cambridge University Press; 1917.  
788 793 p.
- 789 2. Alim K, Hamant O, Boudaoud A. Regulatory Role of Cell Division Rules on  
790 Tissue Growth Heterogeneity. *Front Plant Sci.* 2012 Aug 9;3:174. Available  
791 from: <https://www.frontiersin.org/article/10.3389/fpls.2012.00174/full>
- 792 3. Smith LG. Plant cell division: building walls in the right places. *Nat Rev Mol Cell*  
793 *Biol.* 2001 Jan ;2(1):33–39. Available from:  
794 <http://www.nature.com/articles/35048050>
- 795 4. Lockhart JA. An analysis of irreversible plant cell elongation. *J Theor Biol.*  
796 1965;8:264–75.
- 797 5. Rabillé H, Torode TA, Tesson B, Le Bail A, Billoud B, Rolland E, et al. Alginates  
798 along the filament of the brown alga *Ectocarpus* help cells cope with stress. *Sci*  
799 *Rep.* 2019 Dec 10;9(1):12956. Available from:  
800 <http://www.nature.com/articles/s41598-019-49427-z>
- 801 6. Rabillé H, Billoud B, Tesson B, Le Panse S, Rolland É, Charrier B. The brown  
802 algal mode of tip growth: Keeping stress under control. Nasrallah J, editor. *PLOS*  
803 *Biol.* 2019 Jan ;17(1):e2005258. Available from:  
804 <http://dx.plos.org/10.1371/journal.pbio.2005258>

- 805 7. Braybrook SA, Peaucelle A. Mechano-chemical aspects of organ formation in  
806 *Arabidopsis thaliana*: the relationship between auxin and pectin. *PLoS One*.  
807 2013;8(3):e57813.
- 808 8. Peaucelle A, Braybrook SA, Le Guillou L, Bron E, Kuhlemeier C, Höfte H. Pectin-  
809 induced changes in cell wall mechanics underlie organ initiation in *Arabidopsis*.  
810 *Curr Biol*. 2011;21:1720–6. Available from: [http://ac.els-](http://ac.els-cdn.com/S0960982211009638/1-s2.0-S0960982211009638-main.pdf?_tid=486ab8f6-10a9-11e7-b393-00000aab0f6b&acdnat=1490370670_18f8f853a3317c2c7e86d6d720e37acd)  
811 [cdn.com/S0960982211009638/1-s2.0-S0960982211009638-](http://ac.els-cdn.com/S0960982211009638/1-s2.0-S0960982211009638-main.pdf?_tid=486ab8f6-10a9-11e7-b393-00000aab0f6b&acdnat=1490370670_18f8f853a3317c2c7e86d6d720e37acd)  
812 [main.pdf?\\_tid=486ab8f6-10a9-11e7-b393-](http://ac.els-cdn.com/S0960982211009638/1-s2.0-S0960982211009638-main.pdf?_tid=486ab8f6-10a9-11e7-b393-00000aab0f6b&acdnat=1490370670_18f8f853a3317c2c7e86d6d720e37acd)  
813 [00000aab0f6b&acdnat=1490370670\\_18f8f853a3317c2c7e86d6d720e37acd](http://ac.els-cdn.com/S0960982211009638/1-s2.0-S0960982211009638-main.pdf?_tid=486ab8f6-10a9-11e7-b393-00000aab0f6b&acdnat=1490370670_18f8f853a3317c2c7e86d6d720e37acd)
- 814 9. Chebli Y, Kaneda M, Zerkour R, Geitmann A. The cell wall of the *Arabidopsis*  
815 pollen tube - spatial distribution, recycling, and network formation of  
816 polysaccharides. *Plant Physiol*. 2012;160(4):1940–55. Available from:  
817 <http://www.plantphysiol.org/cgi/doi/10.1104/pp.112.199729>
- 818 10. Derbyshire P, McCann MC, Roberts K. Restricted cell elongation in *Arabidopsis*  
819 hypocotyls is associated with a reduced average pectin esterification level. *BMC*  
820 *Plant Biol*. 2007 Jun 17;7(1):31. Available from:  
821 <http://bmcplantbiol.biomedcentral.com/articles/10.1186/1471-2229-7-31>
- 822 11. Pelletier S, Van Orden J, Wolf S, Vissenberg K, Delacourt J, Ndong YA, et al. A  
823 role for pectin de-methylesterification in a developmentally regulated growth  
824 acceleration in dark-grown *Arabidopsis* hypocotyls. *New Phytol*. 2010 Nov  
825 1;188(3):726–39. Available from: [http://doi.wiley.com/10.1111/j.1469-](http://doi.wiley.com/10.1111/j.1469-8137.2010.03409.x)  
826 [8137.2010.03409.x](http://doi.wiley.com/10.1111/j.1469-8137.2010.03409.x)
- 827 12. Wolf S, Greiner S. Growth control by cell wall pectins. *Protoplasma*. 2012 Jun

- 828 4;249(S2):169–75. Available from: <http://link.springer.com/10.1007/s00709->  
829 011-0371-5
- 830 13. Levesque-Tremblay G, Pelloux J, Braybrook SA, Müller K. Tuning of pectin  
831 methylesterification: consequences for cell wall biomechanics and development.  
832 *Planta*. 2015 Oct;242(4):791–811. Available from:  
833 <http://link.springer.com/10.1007/s00425-015-2358-5>
- 834 14. Bou Daher F, Chen Y, Bozorg B, Clough J, Jönsson H, Braybrook SA.  
835 Anisotropic growth is achieved through the additive mechanical effect of material  
836 anisotropy and elastic asymmetry. *Elife*. 2018 Sep 18;7. Available from:  
837 <https://elifesciences.org/articles/38161>
- 838 15. Peaucelle A, Braybrook SA, Höfte H. Cell wall mechanics and growth control in  
839 plants: the role of pectins revisited. *Front Plant Sci*. 2012;3(121):1–6.
- 840 16. Charrier B, Le Bail A, De Reviers B. Plant Proteus: Brown algal morphological  
841 plasticity and underlying developmental mechanisms. *Trends Plant Sci*.  
842 2012;17(8):468–77.
- 843 17. Domozych DS. Biosynthesis of the Cell Walls of the Algae. In: Borowitzka MA,  
844 Beardall J, Raven JA, editors. *The Physiology of Microalgae*. Cham: Springer  
845 International Publishing; 2016. p. 47–63. Available from:  
846 [https://doi.org/10.1007/978-3-319-24945-2\\_2](https://doi.org/10.1007/978-3-319-24945-2_2)
- 847 18. Domozych DS. Cell Wall Evolution and Diversity. In: *Polysaccharides:*  
848 *Bioactivity and Biotechnology*. 2015. p. 1–2241.
- 849 19. Deniaud-Bouët E, Kervarec N, Michel G, Tonon T, Kloareg B, Hervé C.

- 850 Chemical and enzymatic fractionation of cell walls from Fucales: Insights into  
851 the structure of the extracellular matrix of brown algae. *Ann Bot.*  
852 2014;114(6):1203–16.
- 853 20. Quatrano RS, Stevens PT. Cell wall assembly in *Fucus* zygotes I.  
854 Characterization of the polysaccharide components. *Plant Physiol.*  
855 1976;62(2):518–25. Available from:  
856 [http://www.scopus.com/inward/record.url?eid=2-s2.0-](http://www.scopus.com/inward/record.url?eid=2-s2.0-0017880210&partnerID=tZOtx3y1)  
857 [0017880210&partnerID=tZOtx3y1](http://www.scopus.com/inward/record.url?eid=2-s2.0-0017880210&partnerID=tZOtx3y1)
- 858 21. Grant GT, Mon ER, Rees DA, Smith PJC, Thom D. Biological interactions  
859 between polysaccharides and divalent cations: the egg-box model. *FEBS Lett.*  
860 1973;32(1):195–8. Available from: [http://ac.els-cdn.com/0014579373807707/1-](http://ac.els-cdn.com/0014579373807707/1-s2.0-0014579373807707-main.pdf?_tid=01bfa9f0-29e7-11e7-b89e-00000aacb35e&acdnat=1493145960_03b88d9bebd5c16f0a2b2d129f82dd69)  
861 [s2.0-0014579373807707-main.pdf?\\_tid=01bfa9f0-29e7-11e7-b89e-](http://ac.els-cdn.com/0014579373807707/1-s2.0-0014579373807707-main.pdf?_tid=01bfa9f0-29e7-11e7-b89e-00000aacb35e&acdnat=1493145960_03b88d9bebd5c16f0a2b2d129f82dd69)  
862 [00000aacb35e&acdnat=1493145960\\_03b88d9bebd5c16f0a2b2d129f82dd69](http://ac.els-cdn.com/0014579373807707/1-s2.0-0014579373807707-main.pdf?_tid=01bfa9f0-29e7-11e7-b89e-00000aacb35e&acdnat=1493145960_03b88d9bebd5c16f0a2b2d129f82dd69)
- 863 22. Hepler PK. Calcium: a central regulator of plant growth and development. *Plant*  
864 *Cell.* 2005;17:2142–55. Available from:  
865 <http://www.plantcell.org/cgi/doi/10.1105/tpc.105.032508>
- 866 23. Linardić M, Braybrook SA. Towards an understanding of spiral patterning in the  
867 *Sargassum muticum* shoot apex. *Sci Rep.* 2017 Dec 24;7(1):13887. Available  
868 from: <http://www.nature.com/articles/s41598-017-13767-5>
- 869 24. Fowler JE, Quatrano RS. Cell polarity, asymmetric division, and cell fate  
870 determination in brown algal zygotes. *Semin Dev Biol.* 1995;6(5):347–58.
- 871 25. Bouget FY, Berger F, Brownlee C. Position dependent control of cell fate in the

- 872 Fucus embryo: role of intercellular communication. Development.  
873 1998;125(11):1999–2008. Available from:  
874 <http://www.ncbi.nlm.nih.gov/pubmed/9570765>
- 875 26. Berger F, Taylor A, Brownlee C. Cell fate determination by the cell-wall in early  
876 *Fucus* development. Science. 1994;263(1989):1421–3.
- 877 27. Brownlee C, Bouget FY. Polarity determination in *Fucus*: from zygote to  
878 multicellular embryo. Semin Cell Dev Biol. 1998;9:179–85. Available from:  
879 <http://www.ncbi.nlm.nih.gov/pubmed/9599413>
- 880 28. Henderson DC, Bisgrove SR, Hable WE, Alessa L, Kropf DL. Division patterns  
881 in the thallus of *Pelvetia compressa* embryos and the effects of gravity.  
882 Protoplasma. 1998;203:112–7. Available from:  
883 <http://download.springer.com/static/pdf/480/art%253A10.1007%252FBF01280593.pdf?originUrl=http%253A%252F%252Flink.springer.com%252Farticle%252F10.1007%252FBF01280593&token2=exp=1496143976~acl=%252Fstatic%252Fpdf%252F480%252Fart%2525253A10.1007%2525252FBF01280593.pdf%253ForiginUrl%253>  
884 593.pdf?originUrl=http%253A%252F%252Flink.springer.com%252Farticle%252F10.1007%252FBF01280593&token2=exp=1496143976~acl=%252Fstatic%  
885 2F10.1007%252FBF01280593&token2=exp=1496143976~acl=%252Fstatic%  
886 252Fpdf%252F480%252Fart%2525253A10.1007%2525252FBF01280593.pdf  
887 %253ForiginUrl%253
- 888 29. Silberfeld T, Leigh JW, Verbruggen H, Cruaud C, de Reviers B, Rousseau F. A  
889 multi-locus time-calibrated phylogeny of the brown algae (Heterokonta,  
890 Ochrophyta, Phaeophyceae): Investigating the evolutionary nature of the “brown  
891 algal crown radiation.” Mol Phylogenet Evol. 2010;56(2):659–74. Available from:  
892 <http://dx.doi.org/10.1016/j.ympcv.2010.04.020>
- 893 30. Yoshida S, Barbier De Reuille P, Lane B, Bassel GW, Prusinkiewicz P, Smith  
894 RS, et al. Genetic control of plant development by overriding a geometric

- 895 division rule. Dev Cell. 2014;29:75–87. Available from:  
896 <http://dx.doi.org/10.1016/j.devcel.2014.02.002>
- 897 31. Kropf DL, Quatrano RS. Localization of membrane-associated calcium during  
898 development of furoid algae using chlorotetracycline. Planta. 1987;171(2):158–  
899 70.
- 900 32. Quatrano R, Shaw S. Role of the cell wall in the determination of cell polarity  
901 and the plane of cell division in embryos. Trends Plant Sci. 1997;2(1):15–21.  
902 Available from: <http://linkinghub.elsevier.com/retrieve/pii/S1360138596100492>
- 903 33. Alessa L, Kropf DL. F-actin marks the rhizoid pole in living *Pelvetia compressa*  
904 zygotes. Development. 1999;126:201–9. Available from:  
905 <http://www.ncbi.nlm.nih.gov/pubmed/9834199>
- 906 34. Fowler JE, Quatrano RS. Plant cell morphogenesis: plasma membrane  
907 interactions with the cytoskeleton and cell wall. Annu Rev Cell Dev Biol.  
908 1997;13:697–743.
- 909 35. Kropf DL. Induction of polarity in furoid zygotes. Plant Cell. 1997;9:1011–20.  
910 Available from:  
911 <https://www.ncbi.nlm.nih.gov/pmc/articles/PMC156975/pdf/091011.pdf>
- 912 36. Bisgrove SR, Kropf DL. Asymmetric cell divisions: zygotes of furoid algae as a  
913 model system. Plant Cell Monogr. 2007;9:323–41. Available from:  
914 [http://dx.doi.org/10.1007/7089\\_038](http://dx.doi.org/10.1007/7089_038)
- 915 37. Kropf DL, Kloareg B, Quatrano RS. Cell wall is required for fixation of the  
916 embryonic axis in *Fucus* zygotes. Science. 1988;239(4836):187–90.



- 917 38. Michel G, Tonon T, Scornet D, Cock JM, Kloareg B. The cell wall polysaccharide  
918 metabolism of the brown alga *Ectocarpus siliculosus*. Insights into the evolution  
919 of extracellular matrix polysaccharides in Eukaryotes. *New Phytol.*  
920 2010;188:82–97.
- 921 39. Torode TA, Siméon A, Marcus SE, Jam M, Le Moigne MA, Duffieux D, et al.  
922 Dynamics of cell wall assembly during early embryogenesis in the brown alga  
923 *Fucus*. *J Exp Bot.* 2016; Available from:  
924 <http://jxb.oxfordjournals.org/lookup/doi/10.1093/jxb/erw369>
- 925 40. Quatrano RS, Brian L, Aldridge J, Schultz T. Polar axis fixation in *Fucus* zygotes:  
926 components of the cytoskeleton and extracellular matrix. *Dev Suppl.* 1991;1:11–  
927 6. Available from: <http://www.ncbi.nlm.nih.gov/pubmed/1720703>
- 928 41. Crayton MA, Wilson E, Quatrano RS. Sulfation of fucoidan in *Fucus* embryos II.  
929 Separation from initiation of polar growth. *Dev Biol.* 1974;39:164–7. Available  
930 from: [http://ac.els-cdn.com/S0012160674800187/1-s2.0-S0012160674800187-](http://ac.els-cdn.com/S0012160674800187/1-s2.0-S0012160674800187-main.pdf?_tid=d80f5cea-4165-11e7-9a3a-00000aab0f27&acdnat=1495729313_dd8d4c5e5c80f0af010460c218795b58)  
931 [main.pdf?\\_tid=d80f5cea-4165-11e7-9a3a-](http://ac.els-cdn.com/S0012160674800187/1-s2.0-S0012160674800187-main.pdf?_tid=d80f5cea-4165-11e7-9a3a-00000aab0f27&acdnat=1495729313_dd8d4c5e5c80f0af010460c218795b58)  
932 [00000aab0f27&acdnat=1495729313\\_dd8d4c5e5c80f0af010460c218795b58](http://ac.els-cdn.com/S0012160674800187/1-s2.0-S0012160674800187-main.pdf?_tid=d80f5cea-4165-11e7-9a3a-00000aab0f27&acdnat=1495729313_dd8d4c5e5c80f0af010460c218795b58)
- 933 42. Gacesa P. Alginates. *Carbohydr Polym.* 1988 Jan 1;8(3):161–82. Available  
934 from: <https://www.sciencedirect.com/science/article/pii/014486178890001X>
- 935 43. Skjak-Bræk G, Larsen B. Biosynthesis of alginate: Purification and  
936 characterisation of mannuronan C-5-epimerase from *Azotobacter vinelandii*.  
937 *Carbohydr Res.* 1985;139(C):273–83.
- 938 44. Madgwick J, Haus A, Larsen B. Polymannuronic acid 5-epimerase from the

- 939 marine alga *Pelvetia canaliculata* (L.) Dcne. et Thur. *Acta Chem Scand.*  
940 1973;27(9):3592–4. Available from:  
941 <https://onlinelibrary.wiley.com/doi/abs/10.1111/nph.16034>
- 942 45. Franklin MJ, Chitnis CE, Gacesa P, Sonesson A, White DC, Ohman DE.  
943 *Pseudomonas aeruginosa* AlgG is a polymer level alginate C5-mannuronan  
944 epimerase. *J Bacteriol.* 1994;176:1821–30.
- 945 46. Draget KI, Skjåk Bræk G, Smidsrød O. Alginic acid gels: the effect of alginate  
946 chemical composition and molecular weight. *Carbohydr Polym.* 1994;25(1):31–  
947 8.
- 948 47. Smidsrød O. The relative extension of alginates having different chemical  
949 composition. *Carbohydr Res.* 1973;27:107–18.
- 950 48. Correlou F, Coelho SM, Bouget FY, Brownlee C. Spatial re-organisation of  
951 cortical microtubules in vivo during polarisation and asymmetric division of  
952 zygotes. *J Cell Sci.* 2005;118:2723–34.
- 953 49. Bogaert KA, Beeckman T, De Clerck O. Photopolarization of *Fucus* zygotes is  
954 determined by time sensitive vectorial addition of environmental cues during axis  
955 amplification. *Front Plant Sci.* 2015;6(26). Available from:  
956 [http://www.frontiersin.org/Plant\\_Evolution\\_and\\_Development/10.3389/fpls.2015.00026/abstract](http://www.frontiersin.org/Plant_Evolution_and_Development/10.3389/fpls.2015.00026/abstract)  
957 5.00026/abstract
- 958 50. Farnham G, Strittmatter M, Coelho S, Cock JM, Brownlee C. Gene silencing in  
959 *Fucus* embryos: Developmental consequences of RNAi-mediated cytoskeletal  
960 disruption. *J Phycol.* 2013;49(5):819–29.

- 961 51. Bothwell JHF, Kisielewska J, Genner MJ, McAinsh MR, Brownlee C. Ca<sup>2+</sup>  
962 signals coordinate zygotic polarization and cell cycle progression in the brown  
963 alga *Fucus serratus*. *Development*. 2008;135(12):2173–81. Available from:  
964 <http://www.ncbi.nlm.nih.gov/pubmed/18480164>
- 965 52. Torode TA, Marcus SE, Jam M, Tonon T, Blackburn RS, Herve C, et al.  
966 Monoclonal antibodies directed to fucoidan preparations from brown algae.  
967 *PLoS One*. 2015;10(2):e0118366.
- 968 53. Barbier de Reuille P, Routier-Kierzkowska A, Kierzkowski D, Bassel GW,  
969 Schüpbach T, Tauriello G, et al. MorphoGraphX: A platform for quantifying  
970 morphogenesis in 4D. *Elife*. 2015 May 6;4:DOI: 10.7554/eLife.05864. Available  
971 from: <http://elifesciences.org/lookup/doi/10.7554/eLife.05864>
- 972 54. Slack JMW. *From Egg to Embryo*. Cambridge University Press; 1991. Available  
973 from:  
974 <https://www.cambridge.org/core/product/identifier/9780511525322/type/book>
- 975 55. Galun E, Torrey JG. Initiation and suppression of apical hairs of *Fucus* embryos.  
976 *Dev Biol*. 1969;19:447–59.
- 977 56. Hamant O, Traas J. The mechanics behind plant development. *New Phytol*.  
978 2010;185(2):369–85.
- 979 57. Cosgrove DJ. Plant cell wall extensibility: connecting plant cell growth with cell  
980 wall structure, mechanics, and the action of wall-modifying enzymes. *J Exp Bot*.  
981 2016;67(2):463–76.
- 982 58. Mørch YA, Holtan S, Donati I, Strand BL, Skjåk-Bræk G. Mechanical properties

- 983 of C-5 epimerized alginates. *Biomacromolecules*. 2008;9:2360–8.
- 984 59. Cock JM, Sterck L, Rouzé P, Scornet D, Allen AE, Amoutzias G, et al. The  
985 *Ectocarpus* genome and the independent evolution of multicellularity in brown  
986 algae. *Nature*. 2010;465(7298):617–21.
- 987 60. Nishitsuji K, Arimoto A, Iwai K, Sudo Y, Hisata K, Fujie M, et al. A draft genome  
988 of the brown alga, *Cladosiphon okamuranus*, S-strain: a platform for future  
989 studies of “mozuku” biology. *DNA Res*. 2016 Dec;23(6):561–70. Available from:  
990 <http://www.ncbi.nlm.nih.gov/pubmed/27501718>
- 991 61. Ye N, Zhang X, Miao M, Fan X, Zheng Y, Xu D, et al. *Saccharina* genomes  
992 provide novel insight into kelp biology. *Nat Commun*. 2015;6:6986. Available  
993 from: <http://www.nature.com/doi/10.1038/ncomms7986>
- 994 62. Shaw SL, Quatrano RS. The role of targeted secretion in the establishment of  
995 cell polarity and the orientation of the division plane in *Fucus* zygotes.  
996 *Development*. 1996;122:2623–30.
- 997 63. Kropf DL, Berger SK, Quatrano RS. Actin localization during *Fucus*  
998 embryogenesis. *Plant Cell*. 1989;1:191–200.
- 999 64. Lamote M, Darko E, Schoefs B, Lemoine Y. Assembly of the photosynthetic  
1000 apparatus in embryos from *Fucus serratus* L. *Photosynth Res*. 2003;77(1):45–  
1001 52. Available from: <http://link.springer.com/10.1023/A:1024999024157>
- 1002 65. McLachlan J, Bidwell RGS. Photosynthesis of eggs, sperm, zygotes, and  
1003 embryos of *Fucus serratus*. *Can J Bot*. 1978 Feb 15;56(4):371–3. Available  
1004 from: <http://www.nrcresearchpress.com/doi/10.1139/b78-045>

- 1005 66. Major KM, Davison IR. Influence of temperature and light on growth and  
1006 photosynthetic physiology of *Fucus evanescens* (Phaeophyta) embryos. Eur J  
1007 Phycol. 1998;33:129–38. Available from:  
1008 [https://www.cambridge.org/core/services/aop-cambridge-](https://www.cambridge.org/core/services/aop-cambridge-core/content/view/2225C55419165505747F5602B998F3E8/S0967026298001620a.pdf/influence_of_temperature_and_light_on_growth_and_photosynthetic_physiology_of_fucus_evanescens_phaeophyta_embryos.pdf)  
1009 [core/content/view/2225C55419165505747F5602B998F3E8/S0967026298001](https://www.cambridge.org/core/content/view/2225C55419165505747F5602B998F3E8/S0967026298001620a.pdf/influence_of_temperature_and_light_on_growth_and_photosynthetic_physiology_of_fucus_evanescens_phaeophyta_embryos.pdf)  
1010 [620a.pdf/influence\\_of\\_temperature\\_and\\_light\\_on\\_growth\\_and\\_photosynthetic](https://www.cambridge.org/core/content/view/2225C55419165505747F5602B998F3E8/S0967026298001620a.pdf/influence_of_temperature_and_light_on_growth_and_photosynthetic_physiology_of_fucus_evanescens_phaeophyta_embryos.pdf)  
1011 [\\_physiology\\_of\\_fucus\\_evanescens\\_phaeophyta\\_embryos.pdf](https://www.cambridge.org/core/content/view/2225C55419165505747F5602B998F3E8/S0967026298001620a.pdf/influence_of_temperature_and_light_on_growth_and_photosynthetic_physiology_of_fucus_evanescens_phaeophyta_embryos.pdf)
- 1012 67. Gibeaut DM, Carpita NC, Vanzin GF, Reiter W-D, Keegstra K, Reiter W-D.  
1013 Synthesis of (1-3), (1-4)-beta-D-glucan in the Golgi apparatus of maize  
1014 coleoptiles. Proc Natl Acad Sci. 1993 May 1;90(9):3850–4. Available from:  
1015 <http://www.ncbi.nlm.nih.gov/pubmed/8483902>
- 1016 68. Strasser R, Altmann F, Mach L, Glössl J, Steinkellner H. Generation of  
1017 *Arabidopsis thaliana* plants with complex N-glycans lacking  $\beta$ 1,2-linked xylose  
1018 and core  $\alpha$ 1,3-linked fucose. FEBS Lett. 2004 Mar 12;561(1–3):132–6. Available  
1019 from: <http://doi.wiley.com/10.1016/S0014-5793%2804%2900150-4>
- 1020 69. Liang Y, Basu D, Pattathil S, Xu W, Venetos A, Martin SL, et al. Biochemical  
1021 and physiological characterization of fut4 and fut6 mutants defective in  
1022 arabinogalactan-protein fucosylation in Arabidopsis. J Exp Bot. 2013 Dec  
1023 1;64(18):5537–51. Available from: [https://academic.oup.com/jxb/article-](https://academic.oup.com/jxb/article-lookup/doi/10.1093/jxb/ert321)  
1024 [lookup/doi/10.1093/jxb/ert321](https://academic.oup.com/jxb/article-lookup/doi/10.1093/jxb/ert321)
- 1025 70. Pabst M, Fischl RM, Brecker L, Morelle W, Fauland A, Köfeler H, et al.  
1026 Rhamnogalacturonan II structure shows variation in the side chains  
1027 monosaccharide composition and methylation status within and across different

- 1028 plant species. *Plant J.* 2013 Jul 1;76(1): 61-72. Available from:  
1029 <http://doi.wiley.com/10.1111/tpj.12271>
- 1030 71. Rautengarten C, Ebert B, Liu L, Stonebloom S, Smith-Moritz AM, Pauly M, et al.  
1031 The Arabidopsis Golgi-localized GDP-L-fucose transporter is required for plant  
1032 development. *Nat Commun.* 2016 Nov 6;7(1):12119. Available from:  
1033 <http://www.nature.com/articles/ncomms12119>
- 1034 72. Hervé C, Siméon A, Jam M, Cassin A, Johnson KL, Salmeán AA, et al.  
1035 Arabinogalactan proteins have deep roots in eukaryotes: Identification of genes  
1036 and epitopes in brown algae and their role in *Fucus serratus* embryo  
1037 development. *New Phytol.* 2016;209:1428–41.
- 1038 73. Liu F, Zhang P, Liang Z, Wang W, Sun X, Wang F. Dynamic profile of proteome  
1039 revealed multiple levels of regulation under heat stress in *Saccharina japonica*.  
1040 *J Appl Phycol.* 2019 May 8;1–13. Available from:  
1041 <http://link.springer.com/10.1007/s10811-019-01813-w>
- 1042 74. Zhang M, Henquet M, Chen Z, Zhang H, Zhang Y, Ren X, et al. LEW3, encoding  
1043 a putative  $\alpha$ -1,2-mannosyltransferase (ALG11) in N-linked glycoprotein, plays  
1044 vital roles in cell-wall biosynthesis and the abiotic stress response in *Arabidopsis*  
1045 *thaliana*. *Plant J.* 2009 Dec 1;60(6):983–99. Available from:  
1046 <http://doi.wiley.com/10.1111/j.1365-313X.2009.04013.x>
- 1047 75. Tøndervik A, Klinkenberg G, Aachmann FL, Svanem BIG, Ertesvaišg H,  
1048 Ellingsen TE, et al. Mannuronan C-5 epimerases suited for tailoring of specific  
1049 alginate structures obtained by high-throughput screening of an epimerase  
1050 mutant library. *Vol. 14, Biomacromolecules.* 2013. p. 2657–66.

- 1051 76. Hartmann M, Holm OB, Johansen GAB, Skjåk-Bræk G, Stokke BT. Mode of  
1052 action of recombinant *Azotobacter vinelandii* mannuronan C-5 epimerases  
1053 AlgE2 and AlgE4. *Biopolymers*. 2002;63(2):77–88.
- 1054 77. Ertesvåg H. Alginate-modifying enzymes: biological roles and biotechnological  
1055 uses. *Front Microbiol*. 2015 May 27;6:523. Available from:  
1056 [http://www.frontiersin.org/Microbiotechnology%252c\\_Ecotoxicology\\_and\\_Biore](http://www.frontiersin.org/Microbiotechnology%252c_Ecotoxicology_and_Bioremediation/10.3389/fmicb.2015.00523/abstract)  
1057 [mediation/10.3389/fmicb.2015.00523/abstract](http://www.frontiersin.org/Microbiotechnology%252c_Ecotoxicology_and_Bioremediation/10.3389/fmicb.2015.00523/abstract)
- 1058 78. Peters NT, Kropf DL. Asymmetric microtubule arrays organize the endoplasmic  
1059 reticulum during polarity establishment in the brown alga *Silvetia compressa*.  
1060 *Cytoskeleton*. 2010;67(2):102–11.
- 1061 79. Bisgrove SR, Henderson DC, Kropf DL. Asymmetric division in fucoid zygotes  
1062 is positioned by telophase nuclei. *Plant Cell*. 2003;15:854–62.
- 1063 80. Katsaros CI, Karyophyllis DA, Galatis BD. Cortical F-actin underlies cellulose  
1064 microfibril patterning in brown algal cells. *Phycologia*. 2002;41(2):178–83.
- 1065 81. Daher FB, Braybrook SA. How to let go: pectin and plant cell adhesion. *Front*  
1066 *Plant Sci*. 2015 Jul 14;6. Available from:  
1067 <http://journal.frontiersin.org/Article/10.3389/fpls.2015.00523/abstract>
- 1068 82. Probine MC, Preston RD. Cell Growth and the Structure and Mechanical  
1069 Properties of the Wall in Internodal Cells of *Nitella opaca*: II. MECHANICAL  
1070 PROPERTIES OF THE WALLS. *J Exp Bot*. 1962 ;13(1):111–27. Available from:  
1071 <https://academic.oup.com/jxb/article-lookup/doi/10.1093/jxb/13.1.111>
- 1072 83. Baskin TI, Meekes HTHM, Liang BM, Sharp RE. Regulation of Growth

- 1073 Anisotropy in Well-Watered and Water-Stressed Maize Roots. II. Role of Cortical  
1074 Microtubules and Cellulose Microfibrils. *Plant Physiol.* 1999 Feb 1;119(2):681–  
1075 92. Available from:  
1076 <http://www.plantphysiol.org/lookup/doi/10.1104/pp.119.2.681>
- 1077 84. Pietra S, Gustavsson A, Kiefer C, Kalmbach L, Hörstedt P, Ikeda Y, et al.  
1078 *Arabidopsis* SABRE and CLASP interact to stabilize cell division plane  
1079 orientation and planar polarity. *Nat Commun.* 2013 Dec 15;4(1):2779. Available  
1080 from: <http://www.nature.com/articles/ncomms3779>
- 1081 85. Novotny AM, Forman M. The relationship between changes in cell wall of and  
1082 the establishment of polarity in *Fucus* embryos. *Dev Biol.* 1974;40:162–73.
- 1083 86. Terauchi M, Chikako Nagasato B, Akira Inoue B, Toshiaki Ito B, Taizo Motomura  
1084 B. Distribution of alginate and cellulose and regulatory role of calcium in the cell  
1085 wall of the brown alga *Ectocarpus siliculosus* (Ectocarpales, Phaeophyceae).  
1086 *Planta.* 2016;(244):361–77. Available from:  
1087 <https://link.springer.com/content/pdf/10.1007%2Fs00425-016-2516-4.pdf>
- 1088 87. Tran ML, Roberts AW. *Cellulose synthase* gene expression profiling of  
1089 *Physcomitrella patens*. *Plant Biol.* 2016 May 1;18(3):362–8. Available from:  
1090 <http://doi.wiley.com/10.1111/plb.12416>
- 1091 88. Appenzeller L, Doblin M, Barreiro R, Wang H, Niu X, Kollipara K, et al. Cellulose  
1092 synthesis in maize: isolation and expression analysis of the cellulose synthase  
1093 (CesA) gene family. Vol. 11, *Cellulose*. Kluwer Academic Publishers; 2004.  
1094 Available from:  
1095 <https://search.proquest.com/docview/2260106533?accountid=14512>



- 1096 89. Handakumbura PP, Matos DA, Osmont KS, Harrington MJ, Heo K, Kafle K, et  
1097 al. Perturbation of *Brachypodium distachyon* CELLULOSE SYNTHASE A4 or 7  
1098 results in abnormal cell walls. BMC Plant Biol. 2013 Sep 11;13(1):131. Available  
1099 from: [http://bmcplantbiol.biomedcentral.com/articles/10.1186/1471-2229-13-](http://bmcplantbiol.biomedcentral.com/articles/10.1186/1471-2229-13-131)  
1100 131
- 1101 90. Raimundo SC, Pattathil S, Ebert B, Hahn MG, Popper ZA.  $\beta$ -1,3-Glucans are  
1102 components of brown seaweed (Phaeophyceae) cell walls. Protoplasma.  
1103 2017;254(2):997–1016.
- 1104 91. Bisgrove SR, Kropf DL. Cell wall deposition during morphogenesis in fucoid  
1105 algae. Planta. 2001 Apr 12;212:648–58. Available from:  
1106 <http://link.springer.com/10.1007/s004250000434>
- 1107 92. Chi S, Liu T, Wang X, Wang R, Wang S, Wang G, et al. Functional genomics  
1108 analysis reveals the biosynthesis pathways of important cellular components  
1109 (alginate and fucoidan) of *Saccharina*. Curr Genet. 2018 Feb 19;64(1):259–73.  
1110 Available from: <http://link.springer.com/10.1007/s00294-017-0733-4>
- 1111 93. Ponce NMA, Leonardi PI, Flores ML, Stortz CA, Rodríguez MC. Polysaccharide  
1112 localization in the sporophyte cell wall of *Adenocystis utricularis* (Ectocarpales  
1113 s.l., Phaeophyceae). Phycologia. 2007 Nov;46(6):675–9. Available from:  
1114 <http://www.phycologia.org/doi/abs/10.2216/06-102.1>
- 1115 94. Nyvall P, Corre E, Boisset C, Barbeyron T, Rousvoal S, Scornet D, et al.  
1116 Characterization of mannuronan C-5-epimerase genes from the brown alga  
1117 *Laminaria digitata*. Plant Physiol. 2003;133:726–35.

- 1118 95. Feng T, Shao S, Pang J, Li J, Li X. De novo transcriptome analysis of the  
1119 gametophyte of *Undaria pinnatifida* (Phaeophyceae). *J Appl Phycol.*  
1120 2015;27:1011–9.
- 1121 96. Inoue A, Satoh A, Morishita M, Tokunaga Y, Miyakawa T, Tanokura M, et al.  
1122 Functional heterologous expression and characterization of mannuronan C5-  
1123 epimerase from the brown alga *Saccharina japonica*. *Algal Res.* 2016;16:282–  
1124 91.
- 1125 97. Fischl R, Bertelsen K, Gaillard F, Coelho S, Michel G, Klinger M, et al. The cell-  
1126 wall active mannuronan C5-epimerases in the model brown alga *Ectocarpus*:  
1127 From gene context to recombinant protein. *Glycobiology.* 2016;26(9):973–83.
- 1128 98. Novotny AM, Forman M. The composition and development of cell walls of  
1129 *Fucus* embryos. *Planta.* 1975;122:67–78.
- 1130 99. Callow ME, Evans L V, P BG, Callow JA. Fertilisation in brown algae I. SEM and  
1131 other observations on *Fucus serratus*. *J Cell Biol.* 1978;32:45–54.
- 1132 100. Terauchi M, Nagasato C, Inoue A, Ito T, Motomura T. Distribution of alginate  
1133 and cellulose and regulatory role of calcium in the cell wall of the brown alga  
1134 *Ectocarpus siliculosus* (Ectocarpales, Phaeophyceae). *Planta.* 2016 Aug  
1135 12;244(2):361–77. Available from: [http://link.springer.com/10.1007/s00425-](http://link.springer.com/10.1007/s00425-016-2516-4)  
1136 016-2516-4
- 1137 101. Bogaert KA, Beeckman T, De Clerck O. Two-step cell polarization in algal  
1138 zygotes. *Nat Plants.* 2017;3(16221). Available from:  
1139 <http://www.nature.com/articles/nplants2016221>

- 1140 102. Dittami SM, Scornet D, Petit J-L, Ségurens B, Da Silva C, Corre E, et al. Global  
1141 expression analysis of the brown alga *Ectocarpus siliculosus* (Phaeophyceae)  
1142 reveals large-scale reprogramming of the transcriptome in response to abiotic  
1143 stress. *Genome Biol.* 2009 Jun 16;10(6):R66. Available from:  
1144 <http://genomebiology.biomedcentral.com/articles/10.1186/gb-2009-10-6-r66>
- 1145 103. Lipinska AP, Serrano-Serrano ML, Cormier A, Peters AF, Kogame K, Cock JM,  
1146 et al. Rapid turnover of life-cycle-related genes in the brown algae. *Genome*  
1147 *Biol.* 2019 Dec 1;20(1):35. Available from:  
1148 <https://genomebiology.biomedcentral.com/articles/10.1186/s13059-019-1630-6>
- 1149 104. Wang W-J, Wang F-J, Sun X-T, Liu F-L, Liang Z-R. Comparison of  
1150 transcriptome under red and blue light culture of *Saccharina japonica*  
1151 (Phaeophyceae). *Planta.* 2013 Apr 1;237(4):1123–33. Available from:  
1152 <http://link.springer.com/10.1007/s00425-012-1831-7>
- 1153 105. Sun J, Wang L, Wu S, Wang X, Xiao J, Chi S, et al. Transcriptome-wide  
1154 evolutionary analysis on essential brown algae (Phaeophyceae) in China. *Acta*  
1155 *Oceanol Sin.* 2014;33(2):13–9.
- 1156 106. Zhang Y, Wang X, Shan T, Pang S, Xu N. Transcriptome profiling of the  
1157 meristem tissue of *Saccharina japonica* (Phaeophyceae, Laminariales) under  
1158 severe stress of copper. *Mar Genomics.* 2019 Mar 23; Available from:  
1159 <https://www.sciencedirect.com/science/article/pii/S1874778719300017>
- 1160 107. Shao Z, Zhang P, Lu C, Li S, Chen Z, Wang X, et al. Transcriptome sequencing  
1161 of *Saccharina japonica* sporophytes during whole developmental periods  
1162 reveals regulatory networks underlying alginate and mannitol biosynthesis. *BMC*

- 1163 Genomics. 2019 Dec 12;20(1):975. Available from:  
1164 <https://bmcbgenomics.biomedcentral.com/articles/10.1186/s12864-019-6366-x>
- 1165 108. Ding H, Guo L, Li X, Yang G. Transcriptome analysis of kelp *Saccharina*  
1166 *japonica* unveils its weird transcripts and metabolite shift of main components at  
1167 different sporophyte developmental stages. *J Oceanol Limnol.* 2018 Nov 19;1–  
1168 11. Available from: <http://link.springer.com/10.1007/s00343-019-8019-y>
- 1169 109. Jackson C, Salomaki ED, Lane CE, Saunders GW. Kelp transcriptomes provide  
1170 robust support for interfamilial relationships and revision of the little known  
1171 *Arthrothamnaceae* (Laminariales). *J Phycol.* 2017 Feb 1;53(1):1–6. Available  
1172 from: <https://doi.org/10.1111/jpy.12465>
- 1173 110. Tarakhovskaya ER, Kang EJ, Kim KY, Garbary DJ. Influence of phytohormones  
1174 on morphology and chlorophyll a fluorescence parameters in embryos of *Fucus*  
1175 *vesiculosus* L. (Phaeophyceae). *Russ J Plant Physiol.* 2013 Mar 17;60(2):176–  
1176 83. Available from: <http://link.springer.com/10.1134/S1021443713020192>
- 1177 111. Tarakhovskaya E, Lemesheva V, Bilova T, Birkemeyer C. Early embryogenesis  
1178 of brown alga *Fucus vesiculosus* L. is characterized by significant changes in  
1179 carbon and energy metabolism. *Molecules.*  
1180 2017;22(1509):doi:10.3390/molecules22091509. Available from:  
1181 <http://www.mdpi.com/1420-3049/22/9/1509>
- 1182 112. Kim KY, Jeong HJ, Main HP, Garbary DJ. Fluorescence and photosynthetic  
1183 competency in single eggs and embryos of *Ascophyllum nodosum*  
1184 (Phaeophyceae). *Phycologia.* 2006 May 15;45(3):331–6. Available from:  
1185 <https://www.tandfonline.com/doi/full/10.2216/05-40.1>

- 1186 113. Schneider CA, Rasband WS, Eliceiri KW. NIH Image to ImageJ: 25 years of  
1187 image analysis. *Nat Methods*. 2012;9:671–5.
- 1188 114. Evans GC. *The Quantitative Analysis of Plant Growth*. London: Edward Arnold;  
1189 1972.
- 1190 115. Rohland N, Reich D. Cost-effective, high-throughput DNA sequencing libraries  
1191 for multiplexed target capture. *Genome Res*. 2012;22(5):939–46.
- 1192 116. Martin M. Cutadapt removes adapter sequences from high-throughput  
1193 sequencing reads. *EMBnet*. 2011;17(1):10–2. Available from:  
1194 <http://journal.embnet.org/index.php/embnetjournal/article/view/200>
- 1195 117. Haas BJ, Papanicolaou A, Yassour M, Grabherr M, Philip D, Bowden J, et al.  
1196 Reference generation and analysis with Trinity. *Nat Protoc*. 2014;8(8):1–43.
- 1197 118. Fu L, Niu B, Zhu Z, Wu S, Li W. CD-HIT: Accelerated for clustering the next-  
1198 generation sequencing data. *Bioinformatics*. 2012;28(23):3150–2.
- 1199 119. Patro R, Duggal G, Love MI, Irizarry RA, Kingsford C. Salmon provides fast and  
1200 bias-aware quantification of transcript expression. *Nat Methods*.  
1201 2017;14(4):417–9.
- 1202 120. Pimentel H, Bray NL, Puente S, Melsted P, Pachter L. Differential analysis of  
1203 RNA-seq incorporating quantification uncertainty. *Nat Methods*.  
1204 2017;14(7):687–90. Available from: <https://doi.org/10.1038/nmeth.4324>
- 1205 121. Supek F, Bošnjak M, Škunca N, Šmuc T. REVIGO Summarizes and Visualizes  
1206 Long Lists of Gene Ontology Terms. Gibas C, editor. *PLoS One*. 2011 Jul

1207            18;6(7):e21800.                            Available                            from:  
1208            <https://dx.plos.org/10.1371/journal.pone.0021800>  
1209

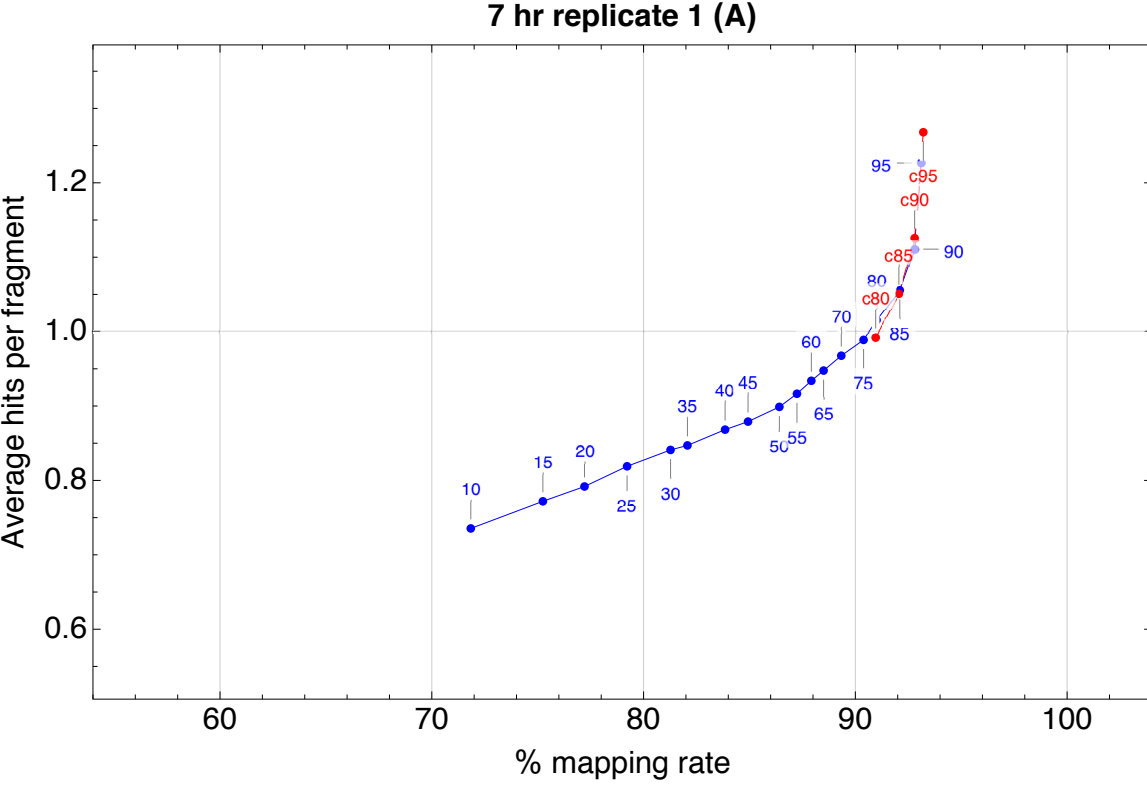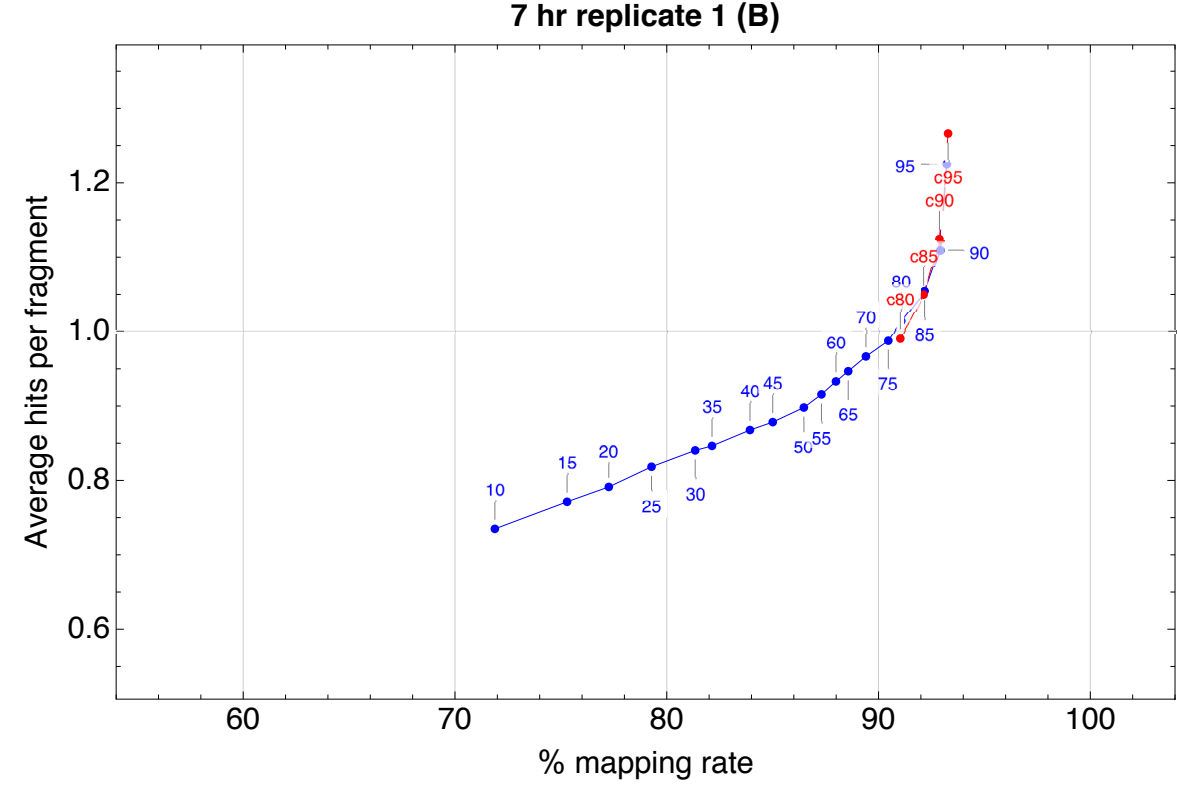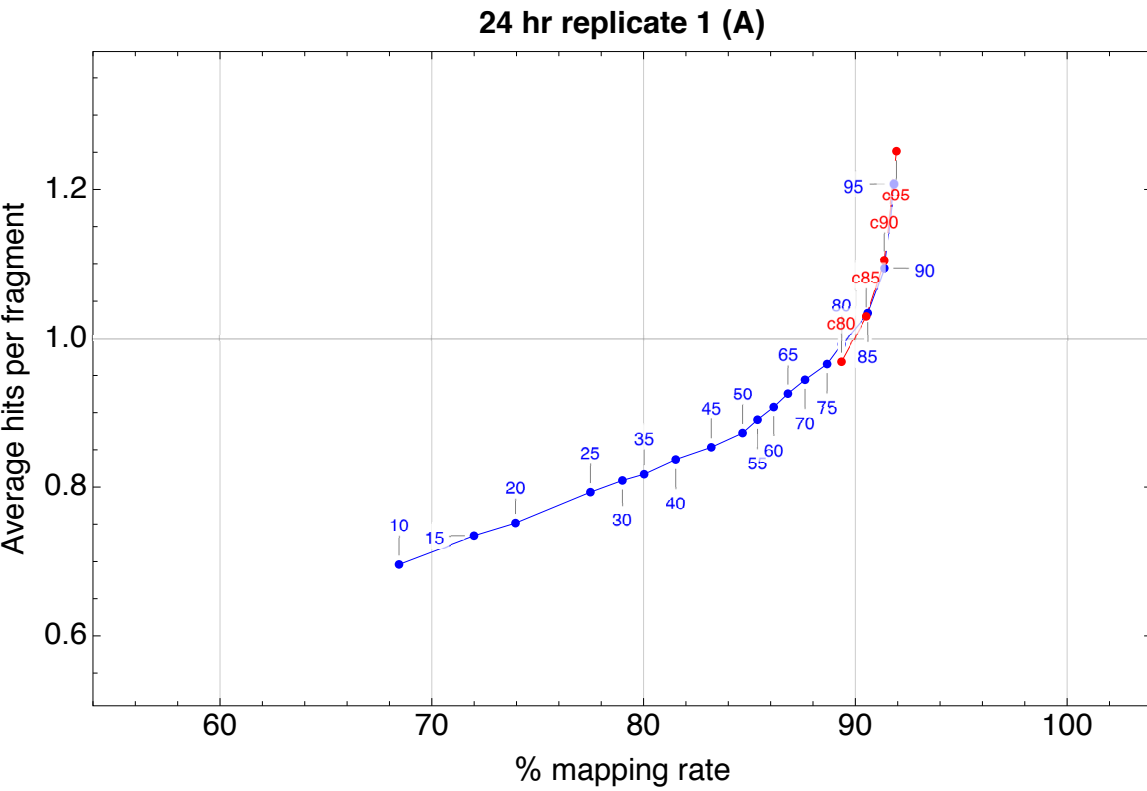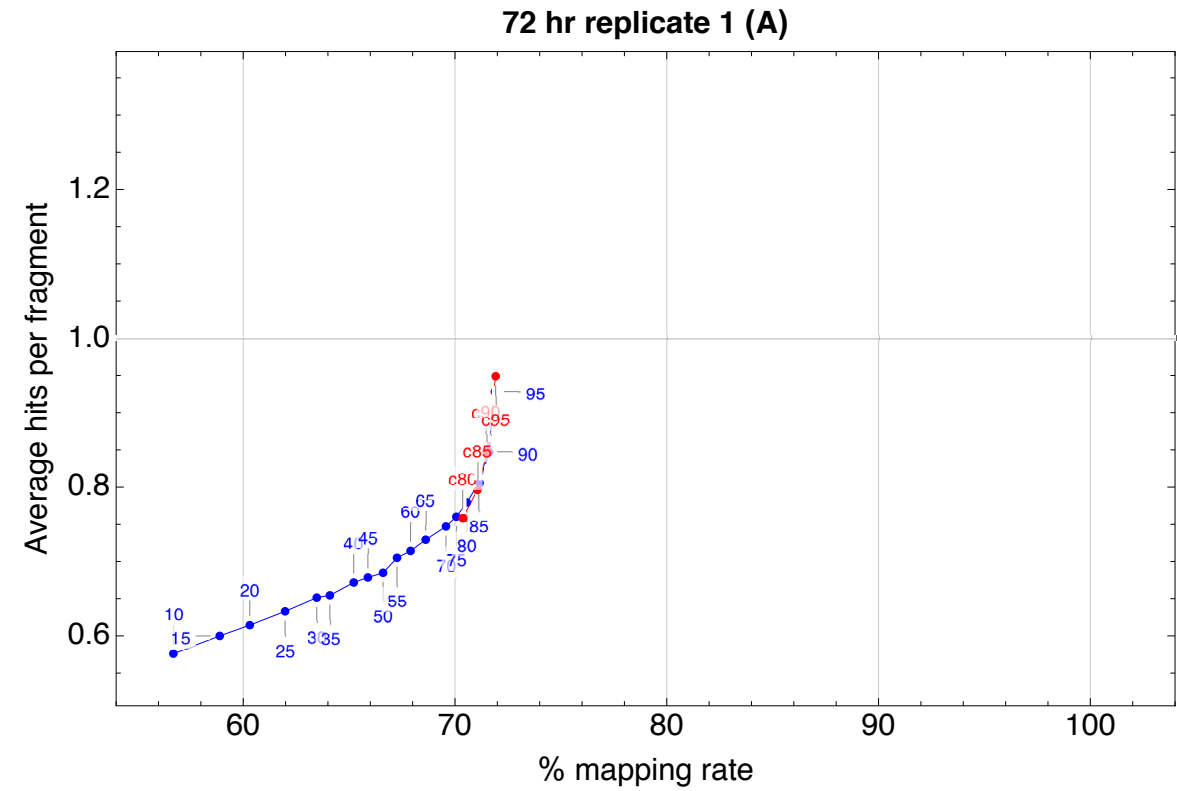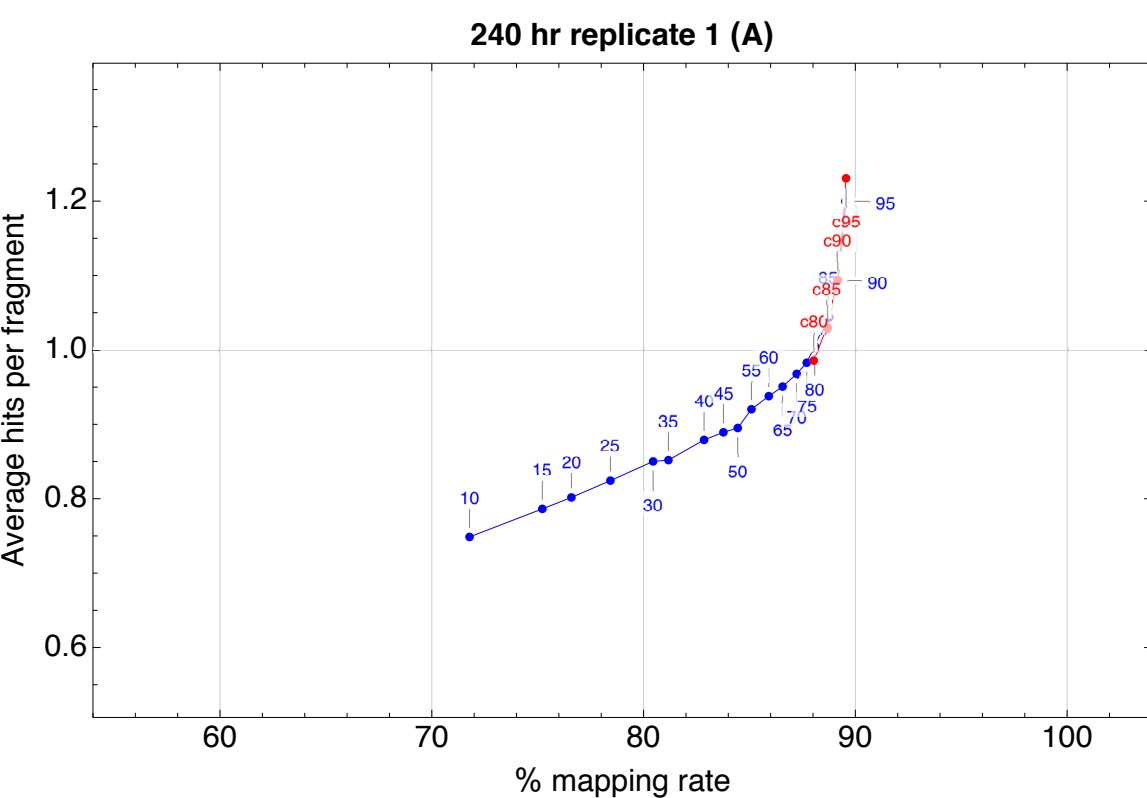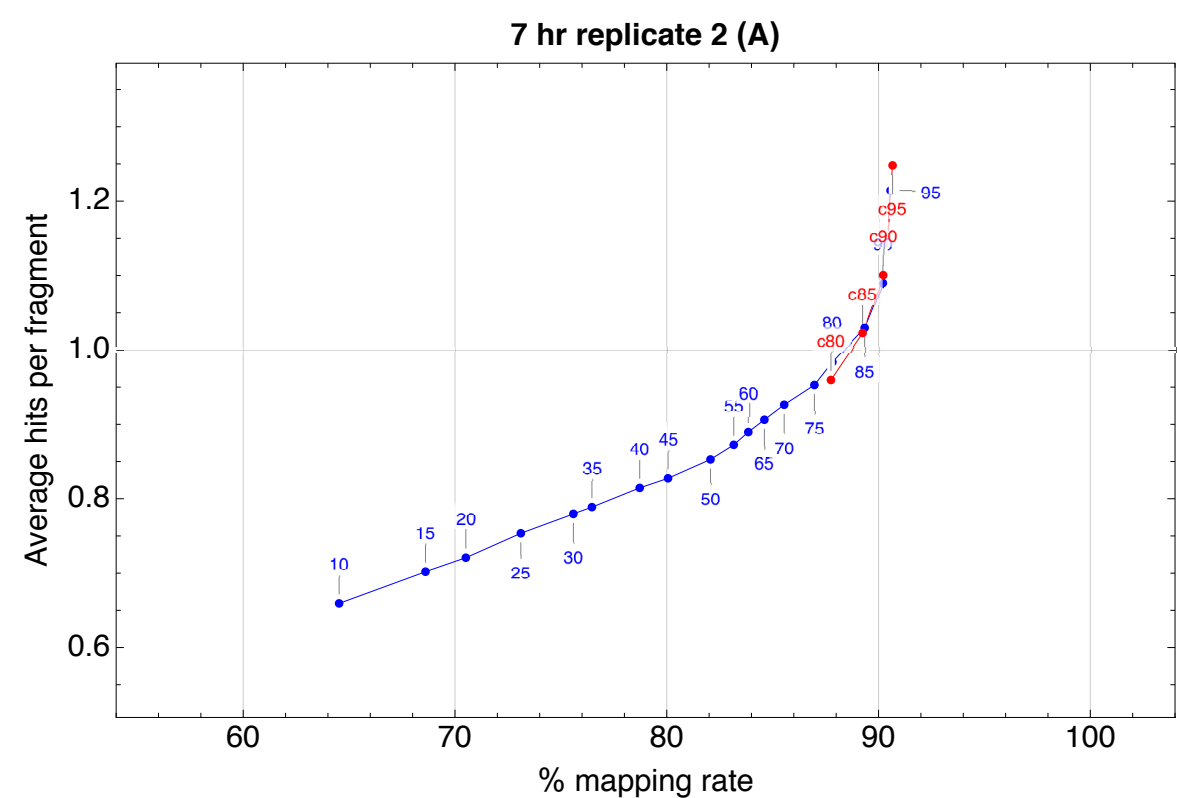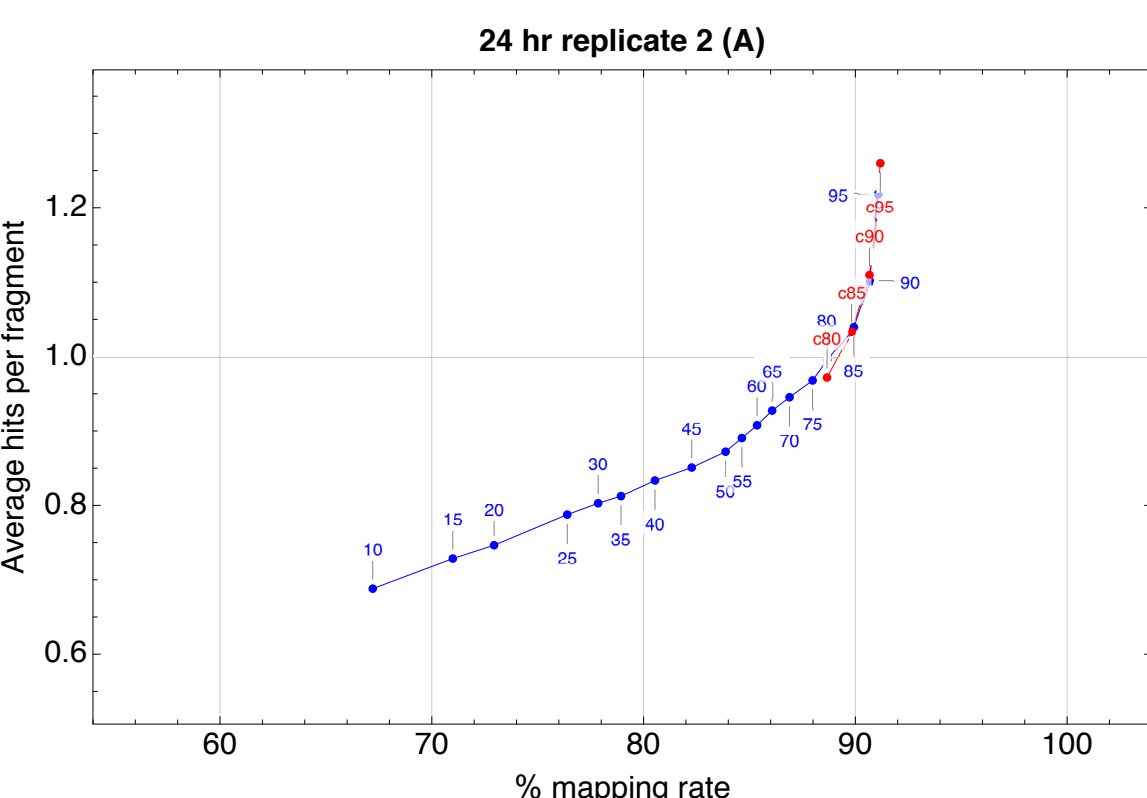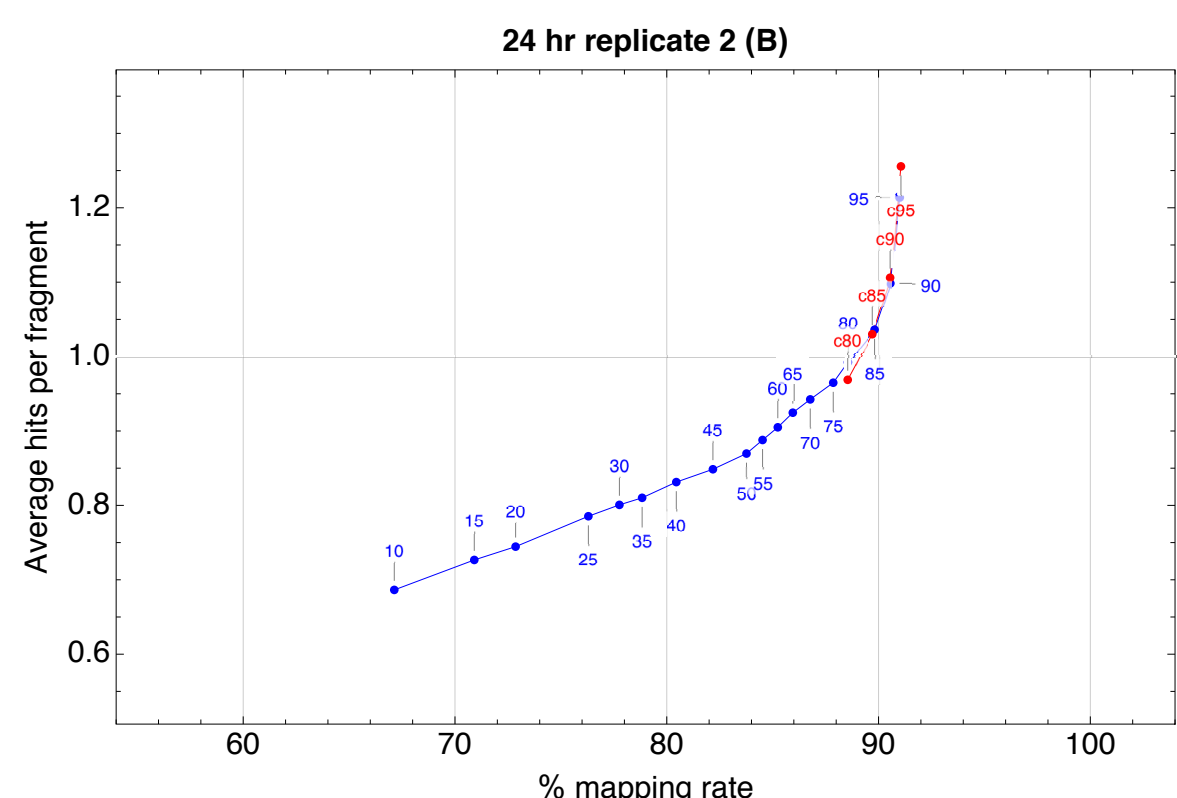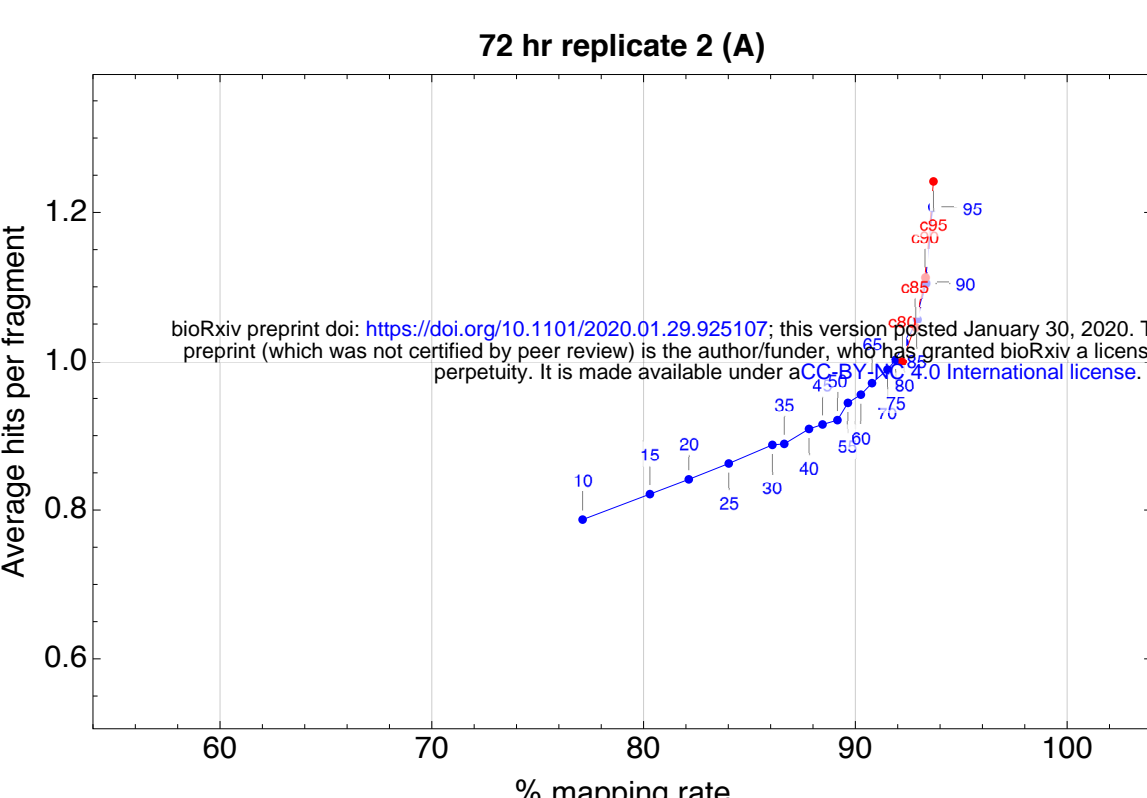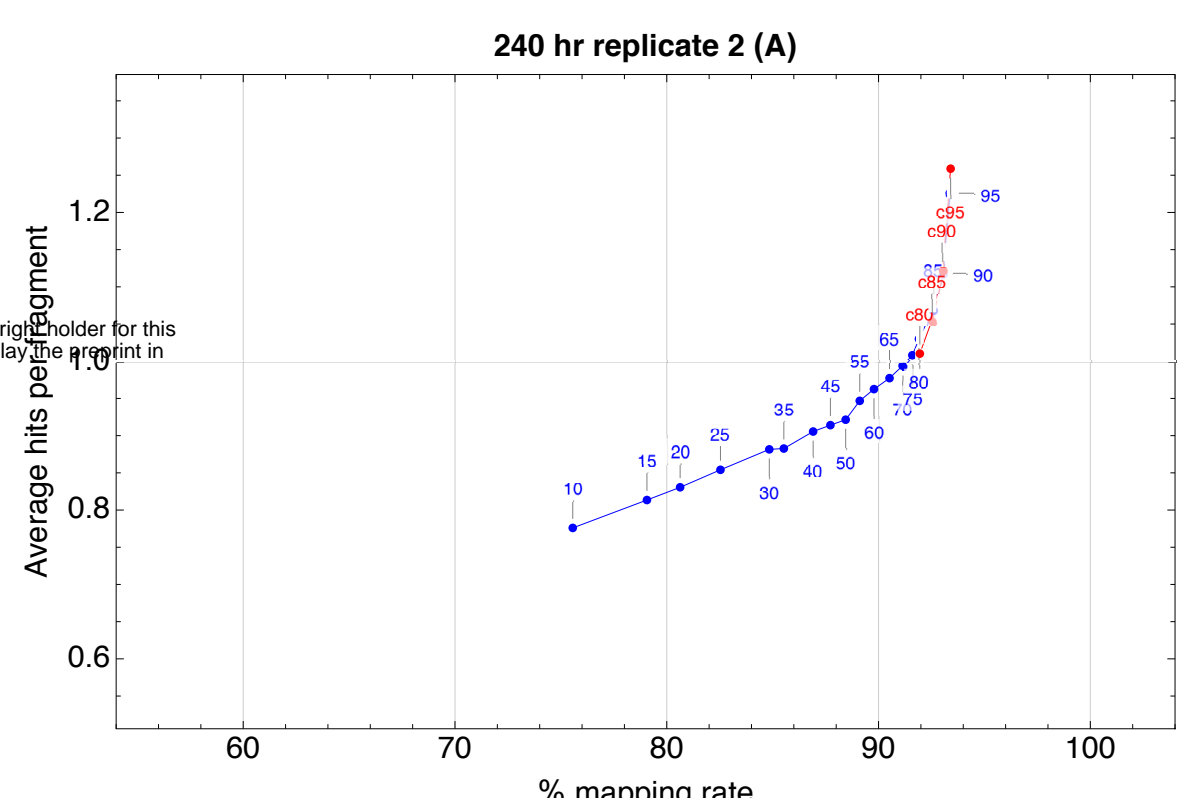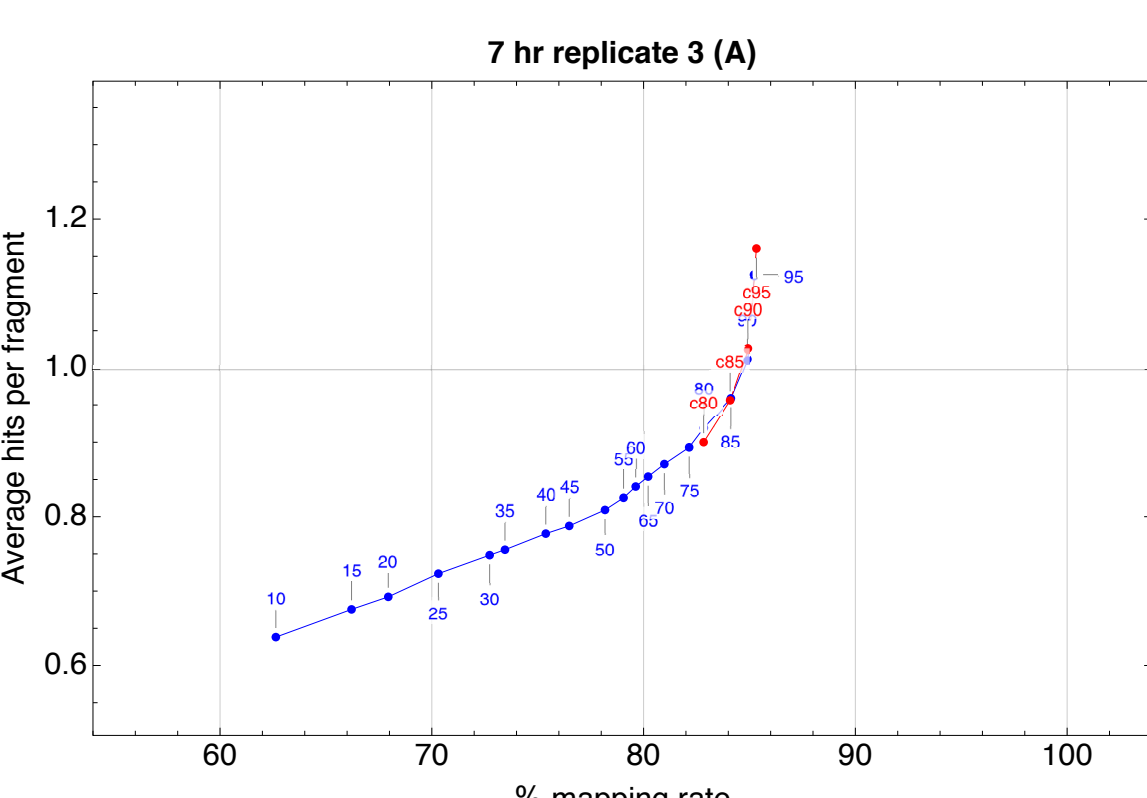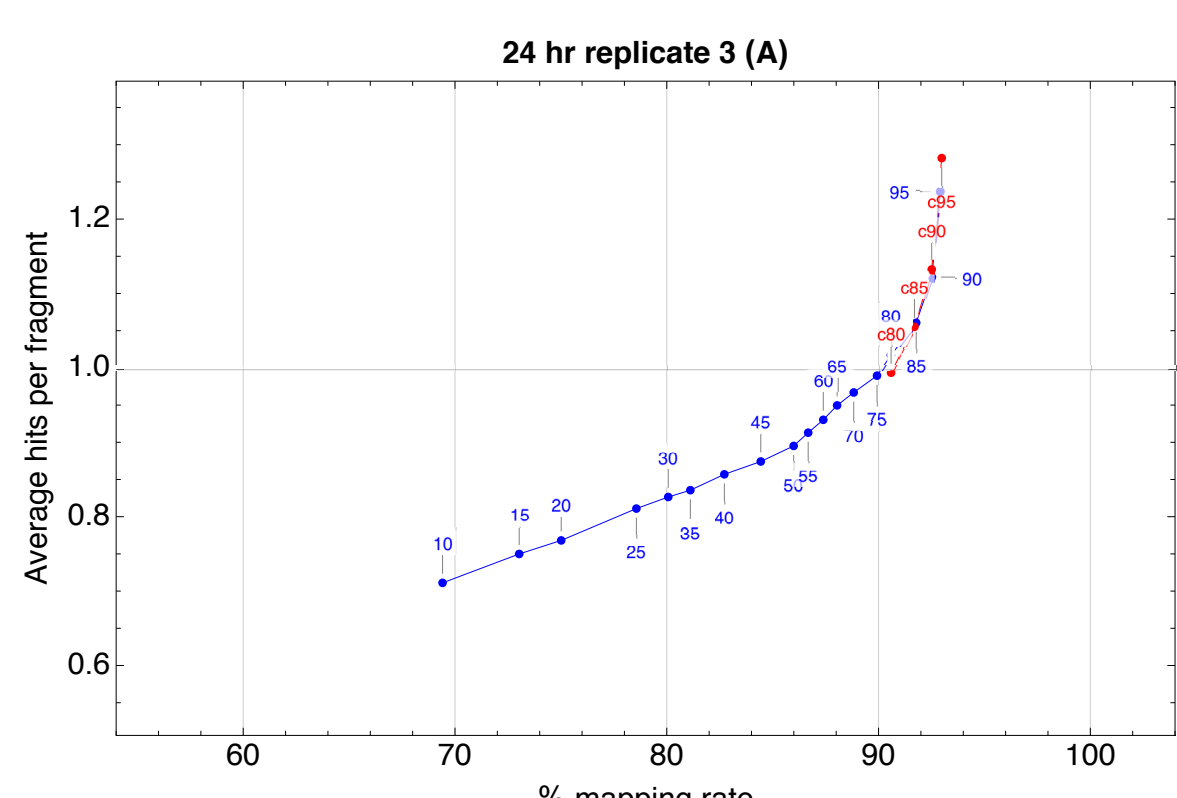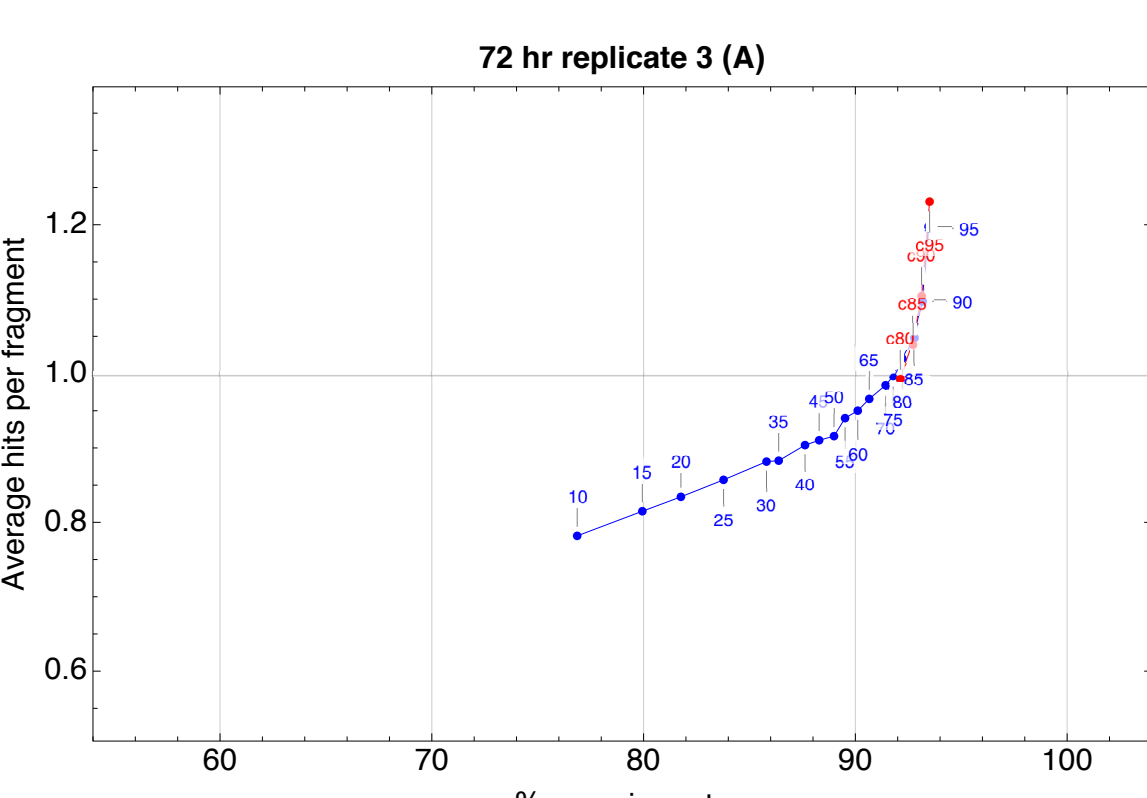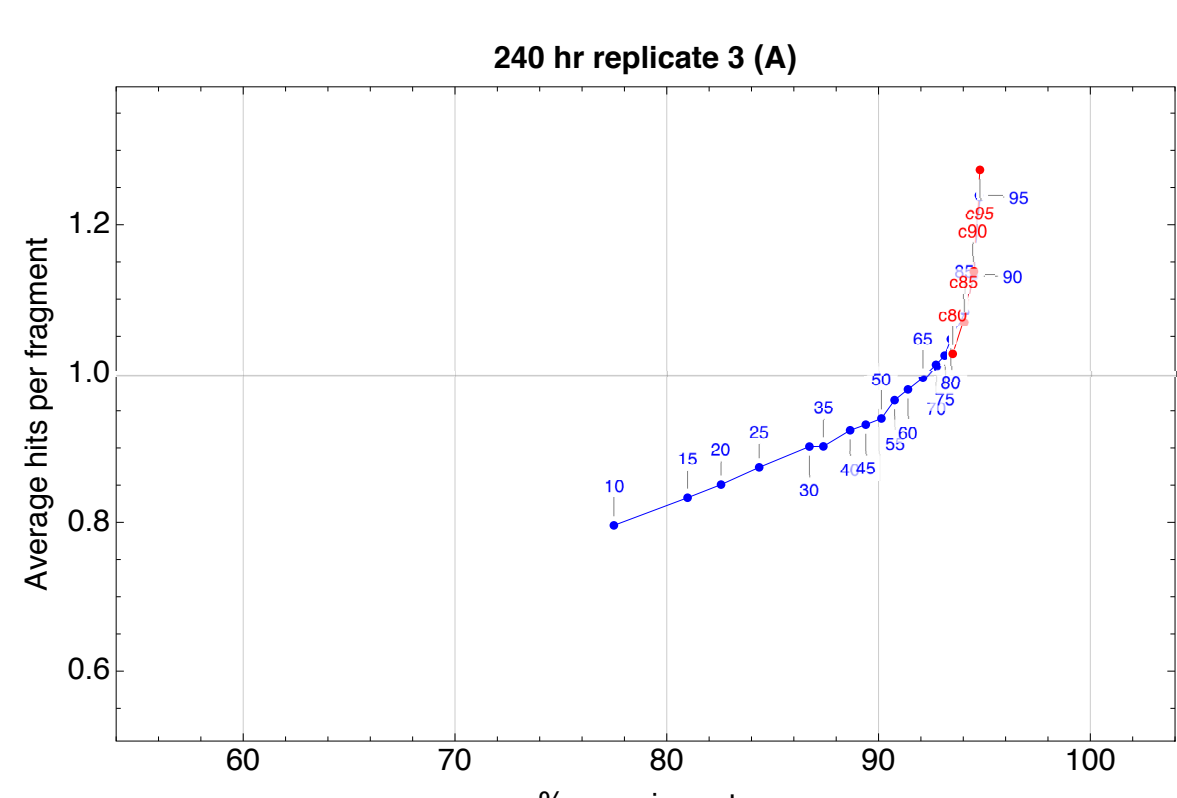

bioRxiv preprint doi: <https://doi.org/10.1101/2020.01.29.925107>; this version posted January 30, 2020. The copyright holder for this preprint (which was not certified by peer review) is the author/funder, who has granted bioRxiv a license to display the preprint in perpetuity. It is made available under aCC-BY-NC 4.0 International license.

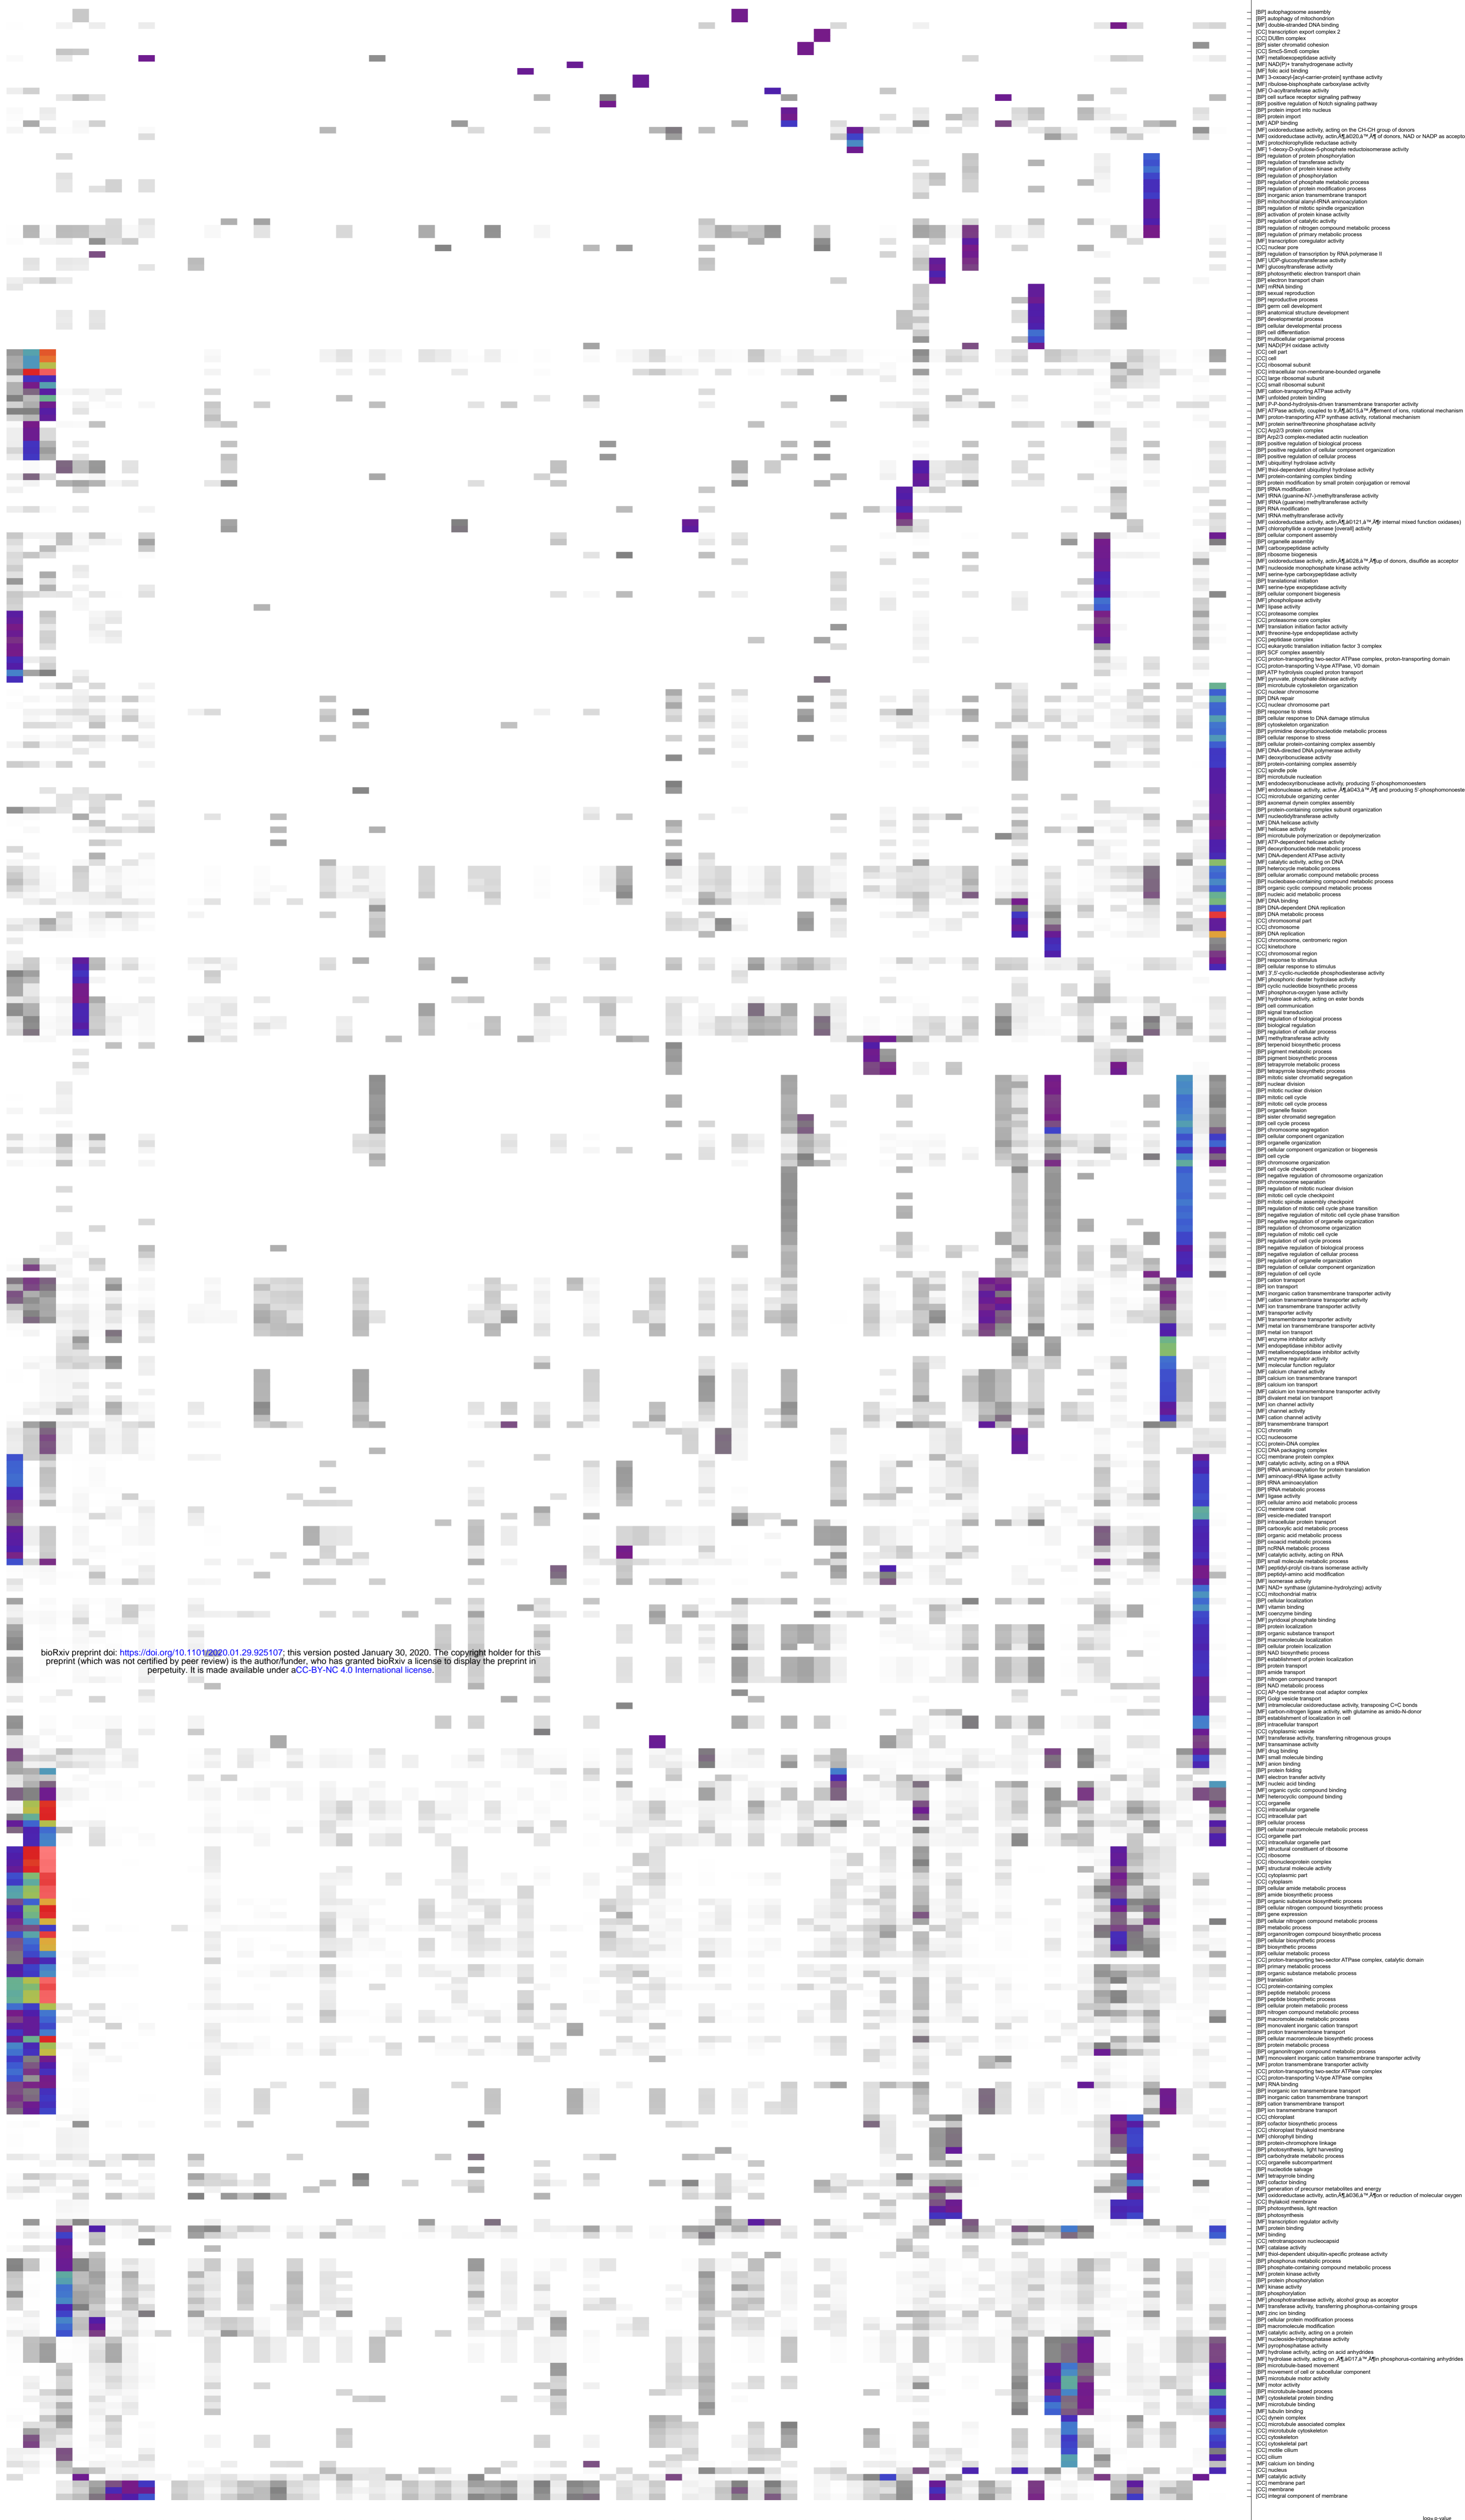

bioRxiv preprint doi: <https://doi.org/10.1101/2020.01.29.925107>; this version posted January 30, 2020. The copyright holder for this preprint (which was not certified by peer review) is the author/funder, who has granted bioRxiv a license to display the preprint in perpetuity. It is made available under aCC-BY-NC 4.0 International license.

log<sub>2</sub> p-value
